# Supplementary material for: Interplay between SMAD2 and STAT5A is a critical determinant of IL-17A/IL-17F differential expression
Source: PubMed Central journal article supplement (PMC8607379; doi:10.1186/s43556-021-00034-3), 2021-04-01
Supplement: 43556_2021_34_MOESM1_ESM.pdf [file 43556_2021_34_MOESM1_ESM.pdf]

## Supplementary Figures and Tables

### **Interplay between SMAD2 and STAT5A is a critical determinant of IL-17A/IL-17F differential expression.**

Karla Fabiola CORRAL-JARA<sup>1</sup>, Camille CHAUVIN<sup>2</sup>, Wassim ABOU-JAOUDE<sup>1</sup>, Maximilien  
GRANDCLAUDON<sup>3</sup>, Aurélien NALDI<sup>1</sup>,  
Vassili SOUMELIS<sup>2\*</sup>, Denis THIEFFRY<sup>1\*</sup>

<sup>1</sup>Computational Systems Biology Team, Institut de Biologie de l'École Normale Supérieure, CNRS UMR8197, INSERM U1024, École Normale Supérieure, PSL Université, 75005 Paris, France.

<sup>2</sup>Integrative Biology of Human Dendritic Cells and T Cells Team, Institut de Recherche St-Louis, U976, Hôpital Saint Louis, 75010 Paris, France.

<sup>3</sup>Institut Curie, Centre de Recherche, PSL Research University, 75005 Paris, France; INSERM U932, Immunity and Cancer, 75005 Paris, France.

\*Corresponding authors.

Email addresses: [denis.thieffry@bio.ens.psl.eu](mailto:denis.thieffry@bio.ens.psl.eu), [vassili.soumelis@aphp.fr](mailto:vassili.soumelis@aphp.fr)

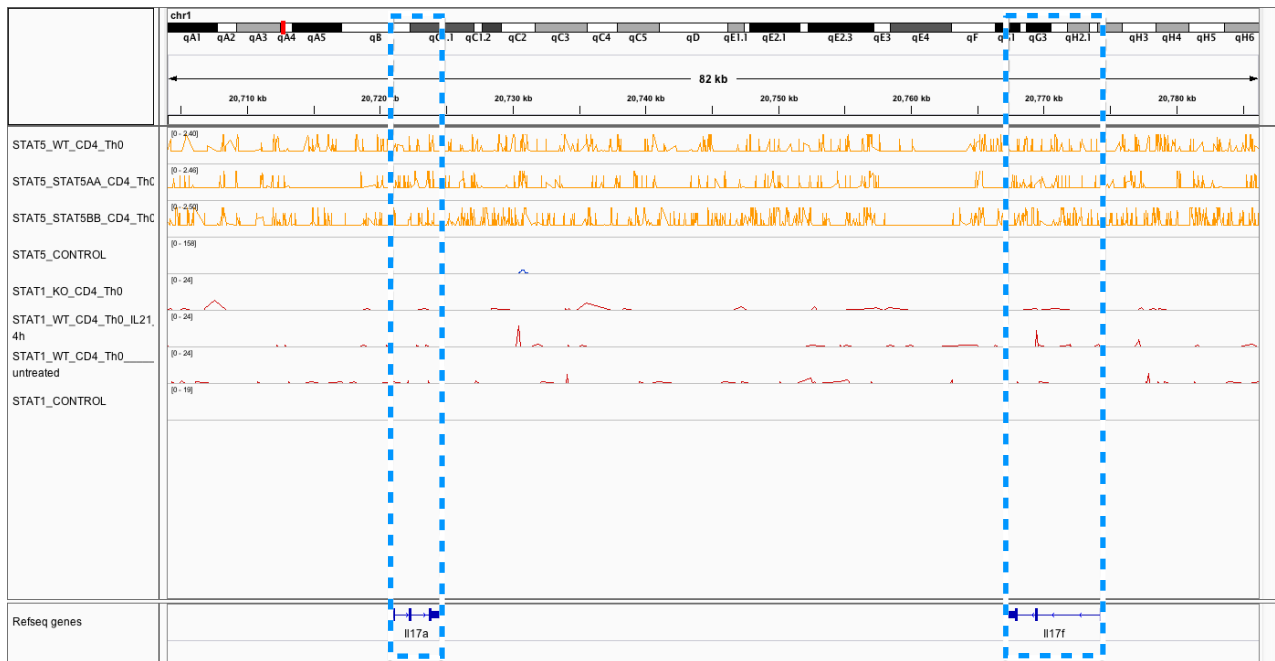

**Supplementary Figure 1. Example of Chip-seq data used to infer novel regulations.** Integrative Genomics Viewer snapshot displaying Chip-seq peaks for STAT5 and STAT1 in the genomic region encompassing IL-17A and IL-17F genes. Each track corresponds to a ChIP-seq dataset identified by the corresponding GSE ID (Cf. Supplementary Table 1).

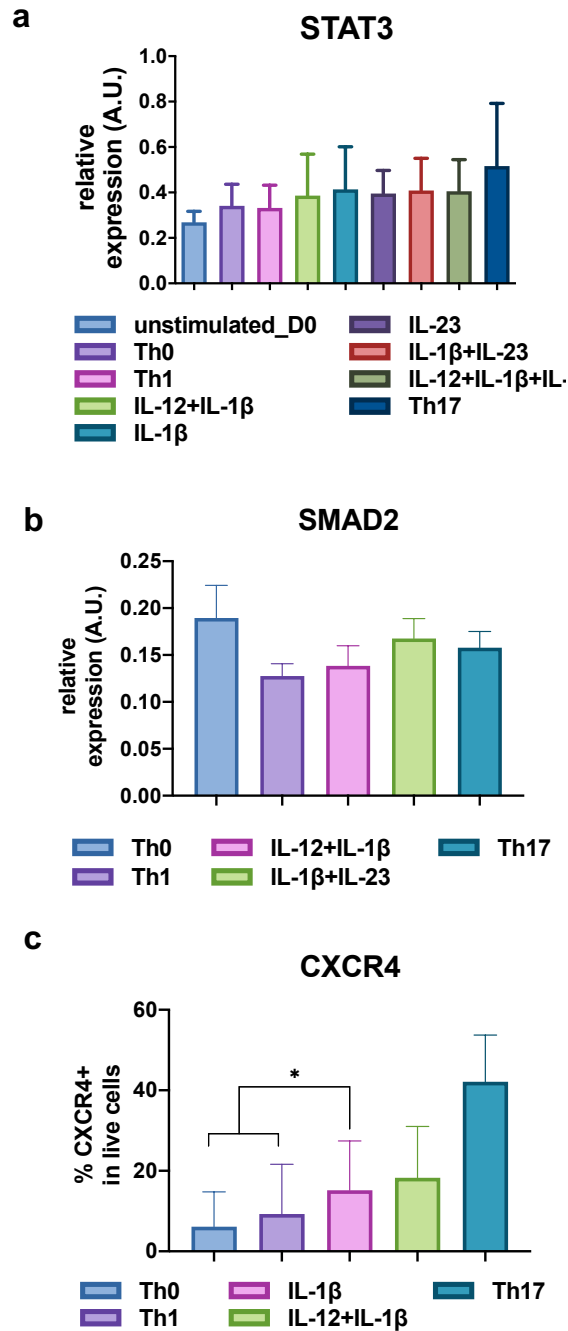

**Supplementary Fig. 2 Quantification of transcription of selected model components.** Human naive T cells were differentiated for five days in the presence of polyclonal activation (anti-CD3/anti-CD28 beads). Cells were cultured in the presence of different cytokine inputs: proTh1 (IL-12), IL-1 $\beta$ , IL-23, IL-12+IL-1 $\beta$ , IL-1 $\beta$ +IL-23, IL-12+IL-1 $\beta$ +IL-23, proTh17 (IL-1 $\beta$ + IL-6+ IL-23+TGF- $\beta$ ). Cells exposed only to polyclonal stimulation were considered as Th0. RNA extraction of differentiated cells was performed and transcripts were then quantified by RT-PCR. Gene expression was normalized to the housekeeping genes HPRT1, B2M and RPL34. Relative expressions of STAT3 (N=6) **(a)**, SMAD2 (N=5) **(b)**. Expression of CXCR4 was assessed by flow cytometry in **(c)** (N=3). Graphs represent mean  $\pm$  SD, \* denotes  $p < 0.05$  (Wilcoxon test for panels a and b, paired t-test for panel c).

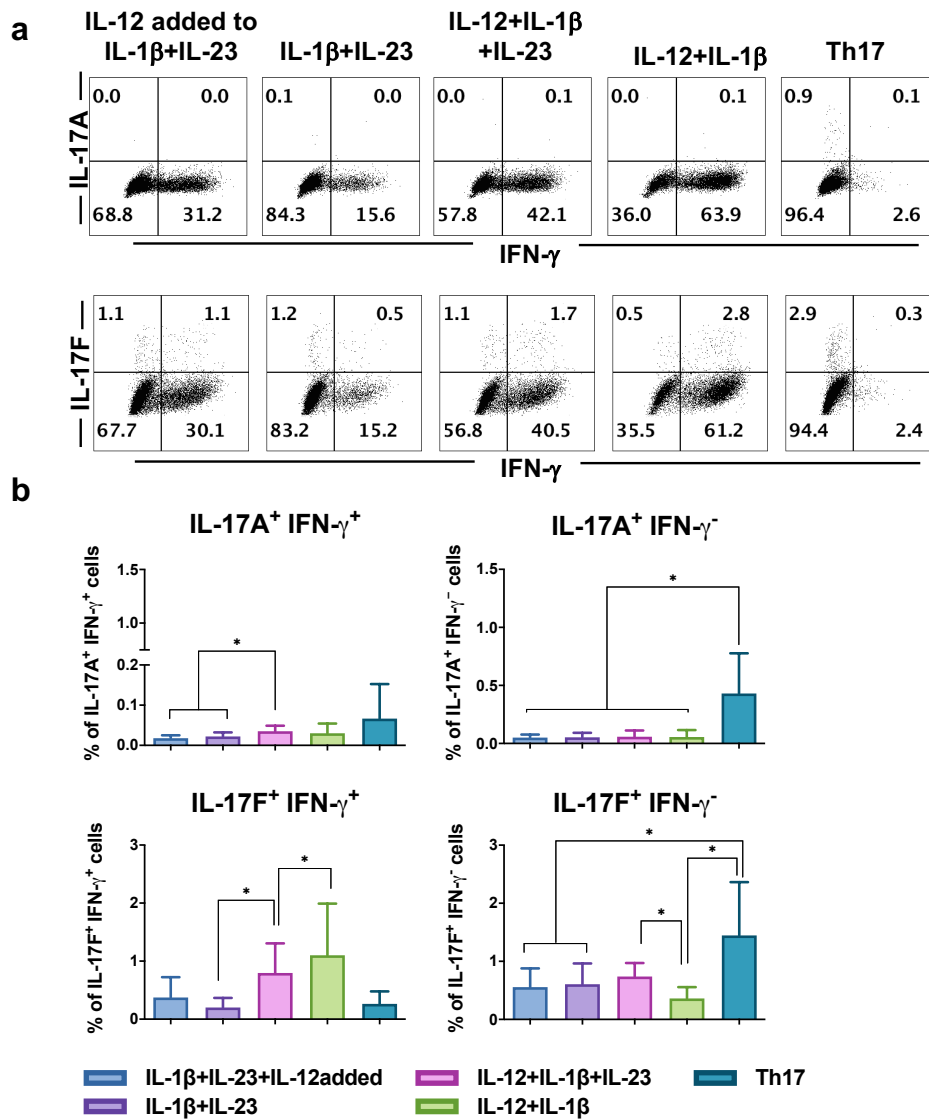

**Supplementary Fig. 3 The addition of IL-12 to CD4+T cells after three days of differentiation slightly affects the IL-17F+IFN- $\gamma$ + cells but not IL-17F+ cells.** Human naive T cells were differentiated for five days in the presence of polyclonal activation (anti-CD3/anti-CD28 beads). Cells were cultured in the presence of different cytokines inputs: IL-12+IL-1 $\beta$ , IL-1 $\beta$ +IL-23, IL-12+IL-1 $\beta$ +IL-23, proTh17 (IL-1 $\beta$ +IL-6+IL-23+TGF- $\beta$ ). After three days, IL-12 was added to cells in the IL-12+IL-1 $\beta$  condition. Differentiated cells were then subjected to flow cytometry analysis. **a)** Dot plot representation of IL-17A and IFN- $\gamma$  cells in live CD4+ cells is shown in upper panels. Dot plot representation of IL-17F and IFN- $\gamma$  cells in live CD4+ cells is shown in lower panels. Representative data from two independent experiments are shown. Number denotes frequency of gated cells. **b)** The frequency of cells for each subset in A is shown. Graphs represent mean  $\pm$  SD, N=6, \* denotes  $p < 0.05$  (Wilcoxon test).

|      |            |
|------|------------|
| OFF  | Red        |
| LOW  | Green      |
| HIGH | Dark Green |

| Stable states | Inputs                                | Phenotypes             |
|---------------|---------------------------------------|------------------------|
| 1             | IL12_In+IL-1B_In                      | IL-17F+                |
| 2             | IL12_In+IL-1B_In                      | IFN- $\gamma$ +IL-17F+ |
| 3             | IL6_In+IL1B_In+IL23_In+TGFB_In (Th17) | IL-17A+                |
| 4             | IL6_In+IL1B_In+IL23_In+TGFB_In (Th17) | IL-17A+IL-17F+         |

|         | 1          | 2          | 3          | 4          |
|---------|------------|------------|------------|------------|
| Tbet    | Red        | Green      | Green      | Green      |
| IL12R   | Green      | Green      | Red        | Red        |
| STAT4   | Green      | Green      | Red        | Red        |
| BLIMP1  | Dark Green | Dark Green | Red        | Dark Green |
| RUNX3   | Red        | Green      | Green      | Green      |
| EOMES   | Red        | Green      | Green      | Green      |
| NFAT2A  | Green      | Green      | Dark Green | Dark Green |
| IL2R    | Dark Green | Dark Green | Red        | Dark Green |
| IL2RA   | Green      | Green      | Red        | Green      |
| STAT5B  | Green      | Green      | Red        | Green      |
| IL2     | Green      | Green      | Red        | Green      |
| SMAD2   | Red        | Red        | Green      | Green      |
| STAT5A  | Dark Green | Dark Green | Red        | Green      |
| FOXP3_2 | Green      | Green      | Red        | Green      |
| SATB1   | Red        | Red        | Green      | Red        |
| MINA    | Red        | Red        | Green      | Red        |
| TGFBR   | Red        | Red        | Green      | Green      |
| CXCR4   | Red        | Red        | Green      | Green      |
| ITK     | Green      | Green      | Dark Green | Dark Green |
| RORgt   | Green      | Green      | Green      | Green      |
| RORa    | Green      | Green      | Green      | Green      |
| IFNg    | Red        | Green      | Red        | Red        |
| IL17A   | Red        | Red        | Green      | Green      |
| IL17F   | Green      | Green      | Red        | Green      |

**Supplementary Fig. 4. Context-dependent stable state analysis identified key internal model components leading to IL-17A vs IL-17F differential expression.** Virtual phenotypes obtained in the following conditions: (i) IL-17F<sup>+</sup> and IFN- $\gamma$ +IL-17F<sup>+</sup> cell phenotypes observed in IL-12+IL-1 $\beta$  condition, and (ii) IL-17A<sup>+</sup> and IL-17A+IL-17F<sup>+</sup> cell phenotypes achieved in proTh17 condition were analyzed. Green cells denote active components (row entries), dark green cells denote the highest activity levels (value 2) in the case of multi-level components and red cells denote inactive components for the corresponding stable state (column entries).

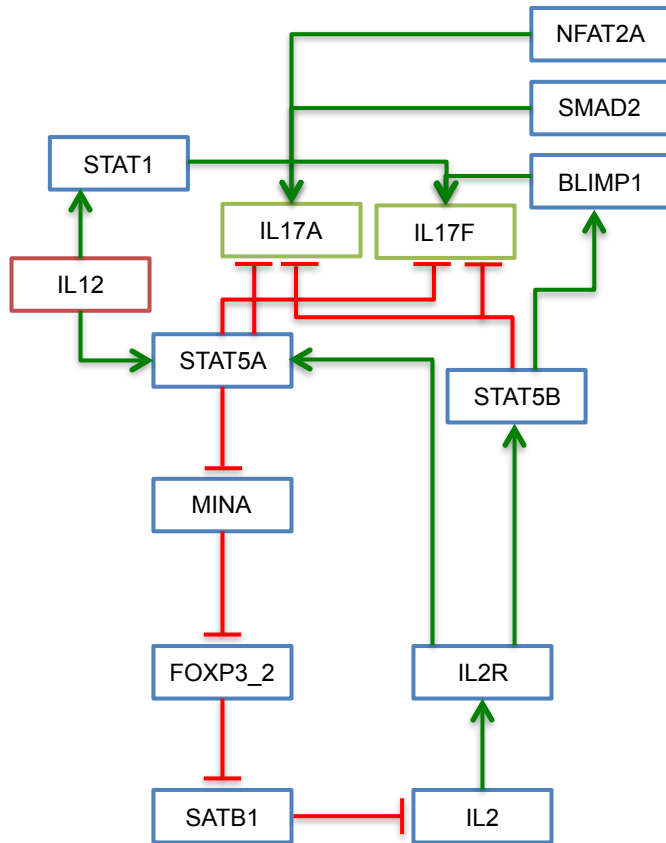

**Supplementary Fig. 5. STAT5A is involved in a circuit affecting BLIMP-1, while SMAD2 and NFAT2A are direct activators of IL-17A.** Schematic representation of a circuit involving the participation of IL-12, STATs: STAT5A and STAT5B, IL-2 and BLIMP-1. Green arrows and blunt red arcs represent positive and negative interactions, respectively.

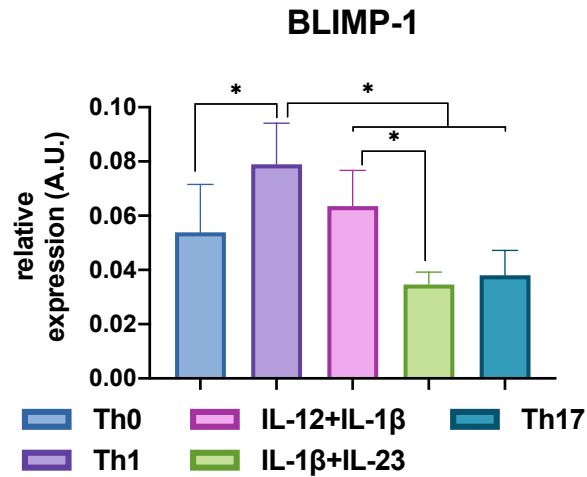

**Supplementary Fig. 6. Relative expression of BLIMP-1.** Human naive T cells were differentiated for five days in the presence of polyclonal activation (anti-CD3/anti-CD28 beads). Cells were cultured in the presence of different cytokines inputs: IL-12, IL-1 $\beta$ , IL-12+IL-1 $\beta$ , Th2 (IL-4), proTh17 (IL-1 $\beta$ +IL-6+IL-23+TGF- $\beta$ ). Cells exposed only to polyclonal stimulation were considered as Th0. RNA extraction of differentiated cells was performed and transcripts were then quantified by RT-PCR. Gene expression was normalized to the reference genes HPRT1, B2M and RPL34. Graphs represent mean  $\pm$  SD, N=6 and \* denotes  $p < 0.05$  (Wilcoxon test).

**Supplementary Table 1. Public RNA-seq and Chip-seq data used in this study.** This table lists the accession IDs of the datasets used to infer the novel interactions integrated in the regulatory graph shown in Fig. 2. All these datasets are gathered in the Gene Expression Omnibus (GEO) database at the NCBI (<https://www.ncbi.nlm.nih.gov/geo/>).

| <b>Transcription Factor</b> | <b>GEO Accession ID</b>     |
|-----------------------------|-----------------------------|
| STAT3                       | GSE67183                    |
| STAT5A                      | GSE77656, GSE3954, GSE40869 |
| STAT3                       | GSE40918                    |
| STAT1/STAT3                 | GSE40463                    |
| STAT4                       | GSE22105                    |
| STAT1                       | GSE63204                    |
| STAT1                       | GSE51531                    |
| STAT1/STAT3                 | GSE40463, GSE60482          |
| STAT1/STAT3                 | GSE45975                    |



**Supplementary Table 2. Environmental conditions used for the model simulations.** Each row corresponds to one prototypic environment, defined in terms of combinations of MHCII, CD4, CD80, PIP2, and of five different cytokine inputs: IL-12, IL-1 $\beta$ , IL-23, TGF- $\beta$  and IL-6.

| <b>Environments</b>       | <b>Cytokines</b>                         | <b>Model active nodes/inputs</b>  | <b>Additional active nodes</b> |
|---------------------------|------------------------------------------|-----------------------------------|--------------------------------|
| proTh0                    | no cytokines                             | none                              | MHCII, CD4, CD80, PIP2         |
| proTh1                    | IL-12                                    | IL12_In                           | MHCII, CD4, CD80, PIP2         |
| IL-12+IL $\beta$          | IL-12, IL-1 $\beta$                      | IL12_In, IL1B_In                  | MHCII, CD4, CD80, PIP2         |
| IL-1 $\beta$              | IL-1 $\beta$                             | IL1B_In                           | MHCII, CD4, CD80, PIP2         |
| IL-23                     | IL-23                                    | IL23_In                           | MHCII, CD4, CD80, PIP2         |
| IL-1 $\beta$ +IL-23       | IL-1 $\beta$ , IL-23                     | IL1B_In, IL23_In                  | MHCII, CD4, CD80, PIP2         |
| IL-12+IL-1 $\beta$ +IL-23 | IL-12, IL-1 $\beta$ , IL-23              | IL12_In, IL1B_In, IL23_In         | MHCII, CD4, CD80, PIP2         |
| proTh17                   | IL-1 $\beta$ , IL-23, IL-6, TGF- $\beta$ | IL1B_In, IL23_In, IL6_In, TGFB_In | MHCII, CD4, CD80, PIP2         |

**Supplementary Table 3. Definition of Th subtypes based on the expression of the master regulators and output cytokines.** In the top part, the first row corresponds to the canonical Th cell subtypes expressing no (Th0) or a single master regulator (Th1, Th17). In the bottom part, the rows list the different Th cell subtypes considered, including hybrid subtypes expressing several specific master regulators and proteins. Green cells denote activation and red cells denote inactivation of transcription factors and proteins for each phenotype.

|                              |                                                                   | Transcription Factors |       | Output Cytokines |        |               |
|------------------------------|-------------------------------------------------------------------|-----------------------|-------|------------------|--------|---------------|
| Input/Environment            | Phenotype description                                             | T-bet                 | RORyt | IL-17A           | IL-17F | IFN- $\gamma$ |
| Th0                          | Cells producing no cytokines                                      |                       |       |                  |        |               |
| Th17                         | Th17 cell expressing IL-17A and IL-17F                            |                       |       |                  |        |               |
| Th1                          | Th1 cell expressing IFN- $\gamma$                                 |                       |       |                  |        |               |
|                              |                                                                   |                       |       |                  |        |               |
|                              |                                                                   | Transcription Factors |       | Output Cytokines |        |               |
| Phenotype name               | Phenotype description                                             | T-bet                 | RORyt | IL-17A           | IL-17F | IFN- $\gamma$ |
| IL-17A                       | Th17 cell expressing only IL-17A                                  |                       |       |                  |        |               |
| IL-17F                       | Th17 expressing only IL-17F                                       |                       |       |                  |        |               |
| IL-17A/IL-17F                | Th17 cell expressing IL-17A and IL-17F                            |                       |       |                  |        |               |
| IFN- $\gamma$                | Th1 cell expressing IFN- $\gamma$                                 |                       |       |                  |        |               |
| IFN- $\gamma$ /IL-17F        | Th1-Th17 hybrid cell expressing IFN- $\gamma$ and IL-17F          |                       |       |                  |        |               |
| IFN- $\gamma$ /IL-17A        | Th1-Th17 hybrid cell expressing IFN- $\gamma$ and IL-17A          |                       |       |                  |        |               |
| IFN- $\gamma$ /IL-17F/IL-17A | Th1-Th17 hybrid cell expressing IFN- $\gamma$ , IL-17F and IL-17A |                       |       |                  |        |               |

**Supplementary Table 4. Annotations of the components of the logical model for Th IL-17A and IL-17F differential expression.** For each model component of the model, the left column specifies the corresponding symbol (obeying standard restrictions for computational IDs). The right column provide successively: i) a logical rule combining literals with Boolean operators (cf. Methods) or the mention “input node” when relevant, ii) a short description of the function the node, and iii) supporting references via unique identifiers for specific database entries (“hgnc” refers to HUGO Gene Nomenclature Committee - <https://www.genenames.org/>, “uniprot” to the reference protein database - <https://www.uniprot.org/>, and “pmid” to NCBI bibliographical database - <https://pubmed.ncbi.nlm.nih.gov/>).

| Node ID | Value                                                                                                                                                                                                                                                                                                                                              | Logical rule - The symbols !, & and   stand for the Boolean operators NOT, AND and OR, respectively. |
|---------|----------------------------------------------------------------------------------------------------------------------------------------------------------------------------------------------------------------------------------------------------------------------------------------------------------------------------------------------------|------------------------------------------------------------------------------------------------------|
| IL1B_In | Input node, fixed value defined with initial state.                                                                                                                                                                                                                                                                                                |                                                                                                      |
|         | Interleukin 1 beta [1].<br>External source of IL-1 $\beta$ .                                                                                                                                                                                                                                                                                       |                                                                                                      |
|         | [1] hgnc:5992                                                                                                                                                                                                                                                                                                                                      |                                                                                                      |
| IL6_In  | Input node, fixed value defined with initial state.                                                                                                                                                                                                                                                                                                |                                                                                                      |
|         | External source of Interleukin-6.                                                                                                                                                                                                                                                                                                                  |                                                                                                      |
| IL12_In | Input node, fixed value defined with initial state.                                                                                                                                                                                                                                                                                                |                                                                                                      |
|         | Interleukin 12 subunit p40 [1].<br>External source of IL-12.                                                                                                                                                                                                                                                                                       |                                                                                                      |
|         | [1] hgnc:5970                                                                                                                                                                                                                                                                                                                                      |                                                                                                      |
| IL23_In | Input node, fixed value defined with initial state.                                                                                                                                                                                                                                                                                                |                                                                                                      |
|         | Interleukin 23 subunit alpha [1].<br>External source of IL-23.                                                                                                                                                                                                                                                                                     |                                                                                                      |
|         | [1] hgnc:15488                                                                                                                                                                                                                                                                                                                                     |                                                                                                      |
| TGFB_In | Input node, fixed value defined with initial state.                                                                                                                                                                                                                                                                                                |                                                                                                      |
|         | Transforming growth factor beta-1, TGF- $\beta$ [1].<br>External source of TGF- $\beta$ .                                                                                                                                                                                                                                                          |                                                                                                      |
|         | [1] uniprot:P01137                                                                                                                                                                                                                                                                                                                                 |                                                                                                      |
| IL6_Aut | 1                                                                                                                                                                                                                                                                                                                                                  | PI3K                                                                                                 |
|         | Interleukin 6 [1] produced by the cell and further acting autocrinally.<br>A novel role for the phosphatidylinositol 3-kinase/AKT pathway in mediating induction of interleukin-6 (IL-6) in response to IL-1 is reported in [2].<br>Pharmacological inhibition of phosphatidylinositol 3-kinase (PI3K) inhibited IL-6 mRNA and protein production. |                                                                                                      |
|         | [1] hgnc:6018                                                                                                                                                                                                                                                                                                                                      |                                                                                                      |
|         | [2] pmid:18515365                                                                                                                                                                                                                                                                                                                                  |                                                                                                      |
|         | 1                                                                                                                                                                                                                                                                                                                                                  | IL12R   IL6R                                                                                         |

|              |                                                                                                                                                                                                                                                                                                                                                                                                                                                                                                                                                                                                                                                                                                                                                                                                                                                                                                                                                                                                                                                                                                                                                                                                                                                                                                                                                                                                                                                                                                                                                                                                                                                                                                                                                                                                                                                                                                                                                                                                                                                                                                                                                                                                                                                                                                                          |   |                                                        |
|--------------|--------------------------------------------------------------------------------------------------------------------------------------------------------------------------------------------------------------------------------------------------------------------------------------------------------------------------------------------------------------------------------------------------------------------------------------------------------------------------------------------------------------------------------------------------------------------------------------------------------------------------------------------------------------------------------------------------------------------------------------------------------------------------------------------------------------------------------------------------------------------------------------------------------------------------------------------------------------------------------------------------------------------------------------------------------------------------------------------------------------------------------------------------------------------------------------------------------------------------------------------------------------------------------------------------------------------------------------------------------------------------------------------------------------------------------------------------------------------------------------------------------------------------------------------------------------------------------------------------------------------------------------------------------------------------------------------------------------------------------------------------------------------------------------------------------------------------------------------------------------------------------------------------------------------------------------------------------------------------------------------------------------------------------------------------------------------------------------------------------------------------------------------------------------------------------------------------------------------------------------------------------------------------------------------------------------------------|---|--------------------------------------------------------|
| <b>STAT1</b> | <p>STAT1, signal transducer and activator of transcription 1, Transcription factor [1] [2].<br/> STAT1 is activated by IL-12, STAT1 is tyrosine phosphorylated in response to IL-12 in PHA-activated human T cells, Figure 1, (functional data in human cells) [3].<br/> In STAT3-depleted cells, interleukin IL-6 acquired the capacity to induce apoptosis, correlating with prolonged STAT1 activation and the induction of major histocompatibility complex (MHC) class I expression [4].</p> <p>[1] hgnc:11362</p> <p>[2] uniprot:P42224</p> <p>[3] pmid:9454765</p> <p>[4] pmid:19626047</p>                                                                                                                                                                                                                                                                                                                                                                                                                                                                                                                                                                                                                                                                                                                                                                                                                                                                                                                                                                                                                                                                                                                                                                                                                                                                                                                                                                                                                                                                                                                                                                                                                                                                                                                       |   |                                                        |
| <b>Tbet</b>  | <table border="1" data-bbox="335 672 1519 728"> <tr> <td data-bbox="335 672 462 728">1</td> <td data-bbox="462 672 1519 728">Tbet   (STAT1 &amp; NFAT1 &amp; AP1 &amp; NFKB &amp; !BLIMP1 &amp; !RUNX1)</td> </tr> </table> <p>T-bet, T-box 21, TBX21 gene [1].<br/> T-bet is the master Transcription Factor of Th1 lineage [2].<br/> Auto-activated: Fig 5 (binding and functional data in mice model) [3].<br/> Activated by STAT1: Fig 2 (functional data in mice model) [4].<br/> NFAT, AP-1 and NF-<math>\kappa</math>B in combination with STAT1 binds to the TBX21 promoter [5].<br/> T-bet is inhibited by BLIMP-1. BLIMP-1 binds directly at multiple sites in TBX21 (binding data in mice model) [6].<br/> T-bet is inhibited by RUNX1. Overexpression of RUNX1 was sufficient to reverse the inhibitory effects of T-bet on IL17A production by Th17 cells (functional data in a mice model) [7].<br/> In other words, if T-bet is expressed in excess in the cell, it can inhibit the activation of RORc, since it captures RUNX1 and RUNX1 is necessary for RORc transcription. RUNX1 in addition to inducing RORc also induces RORa. T-bet suppresses IL-21, which is an important inducer of IL-23. Subsequently, the over-expression of RUNX1 retracts the effect of T-bet on the inhibition of the Th17 response. Experimentally this was corroborated with experimental data, where it was observed that in the IL-12 + IL-1<math>\beta</math> condition, T-bet is expressed in excess, while RUNX1 and RORc decrease its expression. In the Th17 condition, T-bet decreases its expression and RUNX1 and RORc can increase its expression. Regarding the expression of IL-23R, no differences were observed between the two conditions, experimentally. This indicates the importance of maintaining a balance of expression between TFs, both negative and positive TFs can interact at the same time but at a certain level of expression.<br/> We consider that T-bet autoactivation is not affected by the presence of BLIMP-1 and RUNX1, since it occurs when T-bet is overexpressed in the cell and the level of T-bet is enough high.</p> <p>[1] hgnc:11599</p> <p>[2] uniprot:Q9UL17</p> <p>[3] pmid:23232398</p> <p>[4] pmid:12006974</p> <p>[5] pmid:20103781</p> <p>[6] pmid:18684923</p> | 1 | Tbet   (STAT1 & NFAT1 & AP1 & NFKB & !BLIMP1 & !RUNX1) |
| 1            | Tbet   (STAT1 & NFAT1 & AP1 & NFKB & !BLIMP1 & !RUNX1)                                                                                                                                                                                                                                                                                                                                                                                                                                                                                                                                                                                                                                                                                                                                                                                                                                                                                                                                                                                                                                                                                                                                                                                                                                                                                                                                                                                                                                                                                                                                                                                                                                                                                                                                                                                                                                                                                                                                                                                                                                                                                                                                                                                                                                                                   |   |                                                        |

|                   |                                                                                                                                                                                                                                                                                                                                                                                                                                                                                                                                                                                                    |
|-------------------|----------------------------------------------------------------------------------------------------------------------------------------------------------------------------------------------------------------------------------------------------------------------------------------------------------------------------------------------------------------------------------------------------------------------------------------------------------------------------------------------------------------------------------------------------------------------------------------------------|
|                   | [7] pmid:21151104                                                                                                                                                                                                                                                                                                                                                                                                                                                                                                                                                                                  |
| <b>IFNg</b>       | 1   Tbet & RUNX3 & EOMES & STAT4 & STAT1 & NFAT1 & AP1                                                                                                                                                                                                                                                                                                                                                                                                                                                                                                                                             |
|                   | Interferon gamma secreted by the cell [1] [2].<br>T-bet and RUNX3 jointly activate IFN- $\gamma$ (binding and functional data, mice model) [3].<br>Activated by STAT4 (functional data in mice model; binding data) [5].<br>Activated by NFAT (functional data in mice model) [6].<br>AP-1 and STAT4 form a complex that exhibits a stronger force of INFgamma promoter than free alone (binding data in mice cell line) [7].<br>STAT1 binds to IFN- $\gamma$ gene and induces its transcription [8].<br>EOMES directly up-regulates IFN- $\gamma$ expression (functional data in mice model) [9]. |
|                   | [1] hgnc:5438                                                                                                                                                                                                                                                                                                                                                                                                                                                                                                                                                                                      |
|                   | [2] uniprot:P01579                                                                                                                                                                                                                                                                                                                                                                                                                                                                                                                                                                                 |
|                   | [3] pmid:17195845                                                                                                                                                                                                                                                                                                                                                                                                                                                                                                                                                                                  |
|                   | [4] pmid:12006974                                                                                                                                                                                                                                                                                                                                                                                                                                                                                                                                                                                  |
|                   | [5] pmid:20969595                                                                                                                                                                                                                                                                                                                                                                                                                                                                                                                                                                                  |
|                   | [6] pmid:11520798                                                                                                                                                                                                                                                                                                                                                                                                                                                                                                                                                                                  |
|                   | [7] pmid:11801649                                                                                                                                                                                                                                                                                                                                                                                                                                                                                                                                                                                  |
|                   | [8] pmid:20103781                                                                                                                                                                                                                                                                                                                                                                                                                                                                                                                                                                                  |
| [9] pmid:19050290 |                                                                                                                                                                                                                                                                                                                                                                                                                                                                                                                                                                                                    |
| <b>IL12RB1</b>    | 1   Basal value.                                                                                                                                                                                                                                                                                                                                                                                                                                                                                                                                                                                   |
|                   | Interleukin 12 receptor subunit beta 1 [1].<br>IL2RB1 is a subchain of the IL-12 and IL-23 receptors [2].<br>We consider the constitutive expression of IL12RB1.                                                                                                                                                                                                                                                                                                                                                                                                                                   |
|                   | [1] hgnc:5971                                                                                                                                                                                                                                                                                                                                                                                                                                                                                                                                                                                      |
|                   | [2] uniprot:P42701                                                                                                                                                                                                                                                                                                                                                                                                                                                                                                                                                                                 |
| <b>IL12RB2</b>    | 1   Basal value.                                                                                                                                                                                                                                                                                                                                                                                                                                                                                                                                                                                   |
|                   | Interleukin 12 receptor subunit beta 2 [1].<br>IL12RB2 is a subchain of the IL-12 receptor [2].<br>We consider the constitutive expression of IL12RB2.                                                                                                                                                                                                                                                                                                                                                                                                                                             |
|                   | [1] hgnc:5972                                                                                                                                                                                                                                                                                                                                                                                                                                                                                                                                                                                      |
|                   | [2] uniprot:Q99665                                                                                                                                                                                                                                                                                                                                                                                                                                                                                                                                                                                 |
| <b>IL12R</b>      | 1   IL12_In & IL12RB1 & IL12RB2                                                                                                                                                                                                                                                                                                                                                                                                                                                                                                                                                                    |
|                   | Activated by its subchain(s) IL12RB1, IL12RB2 and by its associated cytokine(s) (external IL12).                                                                                                                                                                                                                                                                                                                                                                                                                                                                                                   |
|                   | 1   IL12R                                                                                                                                                                                                                                                                                                                                                                                                                                                                                                                                                                                          |

|                   |                                                                                                                                                                                                                                                                                                                                                                                                                                                                                                                                                       |                                    |
|-------------------|-------------------------------------------------------------------------------------------------------------------------------------------------------------------------------------------------------------------------------------------------------------------------------------------------------------------------------------------------------------------------------------------------------------------------------------------------------------------------------------------------------------------------------------------------------|------------------------------------|
| <b>STAT4</b>      | STAT4, Transcription factor [1] [2].<br>Tyrosine residues on the cytoplasmic segment of the IL-12RB2 chain are involved in STAT4 tyrosine phosphorylation, Figure 3 (functional data in mice and human cells) [3].                                                                                                                                                                                                                                                                                                                                    |                                    |
|                   | hgnc:11365                                                                                                                                                                                                                                                                                                                                                                                                                                                                                                                                            |                                    |
|                   | uniprot:Q14765                                                                                                                                                                                                                                                                                                                                                                                                                                                                                                                                        |                                    |
|                   | pmid:12370372                                                                                                                                                                                                                                                                                                                                                                                                                                                                                                                                         |                                    |
| <b>IL1RAP</b>     | 1                                                                                                                                                                                                                                                                                                                                                                                                                                                                                                                                                     | Basal value.                       |
|                   | Interleukin 1 receptor accessory protein [1].<br>IL1RAP is a subchain of IL-1, IL-33 and IL-36 receptors [2].<br>We consider the constitutively expression of IL1RAP.                                                                                                                                                                                                                                                                                                                                                                                 |                                    |
|                   | [1] hgnc:5995                                                                                                                                                                                                                                                                                                                                                                                                                                                                                                                                         |                                    |
|                   | [2] uniprot:Q9NPH3                                                                                                                                                                                                                                                                                                                                                                                                                                                                                                                                    |                                    |
| <b>IL1R1</b>      | 1                                                                                                                                                                                                                                                                                                                                                                                                                                                                                                                                                     | Basal value.                       |
|                   | Interleukin 1 receptor type 1[1].<br>IL1R1 is a subchain of IL-1 receptor [2].<br>STAT5A activates IL1R1, prediction of Yosef's model (No experimental validation) [3].<br>Yosef's model is based on diverse databases including mice, rat and human information like TRED, MSigDB 3.0.                                                                                                                                                                                                                                                               |                                    |
|                   | [1] hgnc:5993                                                                                                                                                                                                                                                                                                                                                                                                                                                                                                                                         |                                    |
|                   | [2] uniprot:P14778                                                                                                                                                                                                                                                                                                                                                                                                                                                                                                                                    |                                    |
|                   | [3] pmid:23467089                                                                                                                                                                                                                                                                                                                                                                                                                                                                                                                                     |                                    |
| <b>STAT3</b>      | 1                                                                                                                                                                                                                                                                                                                                                                                                                                                                                                                                                     | (IL1R   IL23R   IL6R) & NFkB & AP1 |
|                   | STAT3, signal transducer and activator of transcription 3, transcription factor [1] [2].<br>Activated by IL23R: Figure 6A (functional data in Kit225 cells) [3].<br>Activated by IL1R (functional data in mice model) [4].<br>IRAK1, a downstream component of IL1R signaling path is mainly involved in STAT3 activation [5].<br>Activated by AP1 and NF- $\kappa$ B . PKCO mediated activation of AP-1 and NF- $\kappa$ B for stimulation of the STAT3 promoter (functional data in mice model) [6].<br>It is activated by IL6-gp130 signaling [7]. |                                    |
|                   | [1] hgnc:11364                                                                                                                                                                                                                                                                                                                                                                                                                                                                                                                                        |                                    |
|                   | [2] uniprot:P40763                                                                                                                                                                                                                                                                                                                                                                                                                                                                                                                                    |                                    |
|                   | [3] pmid:12023369                                                                                                                                                                                                                                                                                                                                                                                                                                                                                                                                     |                                    |
|                   | [4] pmid:19380824                                                                                                                                                                                                                                                                                                                                                                                                                                                                                                                                     |                                    |
|                   | [5] pmid:15465816                                                                                                                                                                                                                                                                                                                                                                                                                                                                                                                                     |                                    |
|                   | [6] pmid:22586032                                                                                                                                                                                                                                                                                                                                                                                                                                                                                                                                     |                                    |
| [7] pmid:17493959 |                                                                                                                                                                                                                                                                                                                                                                                                                                                                                                                                                       |                                    |

|              |                                                                                                                                                                                                                                                                                                                                                                                                                                                                                                                                                                                                                                                                                                                                                                                                                                                                                                                                                                                                                                                                                                                                                                                                                                                                                                                                                                                                                                                                                                                                                                                                                                                                                                                                                                                                                                                                                                                                                                                                                                                                                                                      |                                                                                  |
|--------------|----------------------------------------------------------------------------------------------------------------------------------------------------------------------------------------------------------------------------------------------------------------------------------------------------------------------------------------------------------------------------------------------------------------------------------------------------------------------------------------------------------------------------------------------------------------------------------------------------------------------------------------------------------------------------------------------------------------------------------------------------------------------------------------------------------------------------------------------------------------------------------------------------------------------------------------------------------------------------------------------------------------------------------------------------------------------------------------------------------------------------------------------------------------------------------------------------------------------------------------------------------------------------------------------------------------------------------------------------------------------------------------------------------------------------------------------------------------------------------------------------------------------------------------------------------------------------------------------------------------------------------------------------------------------------------------------------------------------------------------------------------------------------------------------------------------------------------------------------------------------------------------------------------------------------------------------------------------------------------------------------------------------------------------------------------------------------------------------------------------------|----------------------------------------------------------------------------------|
| <b>IL21</b>  | 1                                                                                                                                                                                                                                                                                                                                                                                                                                                                                                                                                                                                                                                                                                                                                                                                                                                                                                                                                                                                                                                                                                                                                                                                                                                                                                                                                                                                                                                                                                                                                                                                                                                                                                                                                                                                                                                                                                                                                                                                                                                                                                                    | STAT3 & c_Maf & NFAT1                                                            |
|              | IL-21 secreted by the cell [1] [2].<br>NFAT together with STAT3 and c-MAF activates the transcription of IL-21 [3].                                                                                                                                                                                                                                                                                                                                                                                                                                                                                                                                                                                                                                                                                                                                                                                                                                                                                                                                                                                                                                                                                                                                                                                                                                                                                                                                                                                                                                                                                                                                                                                                                                                                                                                                                                                                                                                                                                                                                                                                  |                                                                                  |
|              | [1] hgnc:6005                                                                                                                                                                                                                                                                                                                                                                                                                                                                                                                                                                                                                                                                                                                                                                                                                                                                                                                                                                                                                                                                                                                                                                                                                                                                                                                                                                                                                                                                                                                                                                                                                                                                                                                                                                                                                                                                                                                                                                                                                                                                                                        |                                                                                  |
|              | [2] uniprot:Q9HBE4                                                                                                                                                                                                                                                                                                                                                                                                                                                                                                                                                                                                                                                                                                                                                                                                                                                                                                                                                                                                                                                                                                                                                                                                                                                                                                                                                                                                                                                                                                                                                                                                                                                                                                                                                                                                                                                                                                                                                                                                                                                                                                   |                                                                                  |
|              | [3] pmid:20103781                                                                                                                                                                                                                                                                                                                                                                                                                                                                                                                                                                                                                                                                                                                                                                                                                                                                                                                                                                                                                                                                                                                                                                                                                                                                                                                                                                                                                                                                                                                                                                                                                                                                                                                                                                                                                                                                                                                                                                                                                                                                                                    |                                                                                  |
| <b>IL17A</b> | 1                                                                                                                                                                                                                                                                                                                                                                                                                                                                                                                                                                                                                                                                                                                                                                                                                                                                                                                                                                                                                                                                                                                                                                                                                                                                                                                                                                                                                                                                                                                                                                                                                                                                                                                                                                                                                                                                                                                                                                                                                                                                                                                    | RORA & RORγt & NFAT2A & SMAD2 & IRF4 & AHR<br>& !(STAT5A & STAT5B) & AP1 & STAT3 |
|              | Interleukin IL-17A [1].<br>The components of the model that affect the activation of IL-17F and IL-17A are very similar, except for RORA and NFAT2A, two transcriptional factors possibly affecting only the expression of IL-17A and not of IL-17F [2].<br>IL-17A is activated by STAT3 (functional data in mice models) [3].<br>It is activated by AHR (functional data in mice model) [4].<br>RORγt in combination with AP-1 and IRF4 binds to the IL-17 promoter region to induce transcription [5].<br>BLIMP-1 co-localizes with RORγt and STAT3 at IL-17A/F loci to enhance their expression. With T cells from the dLNs of mice was demonstrated that BLIMP-1-deficient IL-17 producers were not able to co-express GM-CSF and IFN-γ (functional data in mice model) [6].<br>IL-17A expression is not affected by BLIMP-1 (differential chip-seq peaks patterns in IL-17A vs IL-17F promoters) [6].<br>It has corroborated in RORα knockout mice model that the expression of IL-17A and IL23R decreased, however the expression levels of IL-22, IL-21 and IL-17F mRNA were not affected by RORα deficiency, indicating differential dependency of Th17 cytokines on RORα (functional data in mice model) [7].<br>IL-17A expression is linked to NFAT2 activation (functional data in mice model) [8].<br>We suggest that NFAT2A could be affecting the expression of IL-17A.<br>ChIP-seq data analysis revealed that STAT1 could modulate IL-17F directly, but not IL-17A [6].<br>It is known that STAT5 is an inhibitor of IL-17 (functional data in mice model) [9]. However, there is remaining uncertainty regarding the isoforms of STAT5 acting as an inhibitor of IL-17 and whether this transcription factor preferentially inhibits IL-17F or IL-17A.<br>Hence, we hypothesized that STAT5A and STAT5B inhibit IL-17A. ChIP-seq data show STAT5 peaks in IL-17F and IL-17F genomic regions.<br>SMAD2 is required for the generation of IL-17A in vivo [10]. Experimentally, we observe that IL-17A expression reaches a high value only when TGF-β is present (and subsequently SMAD2 activation). |                                                                                  |
|              | [1] hgnc:5981                                                                                                                                                                                                                                                                                                                                                                                                                                                                                                                                                                                                                                                                                                                                                                                                                                                                                                                                                                                                                                                                                                                                                                                                                                                                                                                                                                                                                                                                                                                                                                                                                                                                                                                                                                                                                                                                                                                                                                                                                                                                                                        |                                                                                  |
|              | [2] uniprot:Q16552                                                                                                                                                                                                                                                                                                                                                                                                                                                                                                                                                                                                                                                                                                                                                                                                                                                                                                                                                                                                                                                                                                                                                                                                                                                                                                                                                                                                                                                                                                                                                                                                                                                                                                                                                                                                                                                                                                                                                                                                                                                                                                   |                                                                                  |
|              | [3] pmid:17404271                                                                                                                                                                                                                                                                                                                                                                                                                                                                                                                                                                                                                                                                                                                                                                                                                                                                                                                                                                                                                                                                                                                                                                                                                                                                                                                                                                                                                                                                                                                                                                                                                                                                                                                                                                                                                                                                                                                                                                                                                                                                                                    |                                                                                  |
|              | [4] pmid:18607004                                                                                                                                                                                                                                                                                                                                                                                                                                                                                                                                                                                                                                                                                                                                                                                                                                                                                                                                                                                                                                                                                                                                                                                                                                                                                                                                                                                                                                                                                                                                                                                                                                                                                                                                                                                                                                                                                                                                                                                                                                                                                                    |                                                                                  |
|              | [5] pmid:20103781                                                                                                                                                                                                                                                                                                                                                                                                                                                                                                                                                                                                                                                                                                                                                                                                                                                                                                                                                                                                                                                                                                                                                                                                                                                                                                                                                                                                                                                                                                                                                                                                                                                                                                                                                                                                                                                                                                                                                                                                                                                                                                    |                                                                                  |
|              | [6] pmid:26750311                                                                                                                                                                                                                                                                                                                                                                                                                                                                                                                                                                                                                                                                                                                                                                                                                                                                                                                                                                                                                                                                                                                                                                                                                                                                                                                                                                                                                                                                                                                                                                                                                                                                                                                                                                                                                                                                                                                                                                                                                                                                                                    |                                                                                  |

|              |                                                                                                                                                                                                                                                                                                                                                                                                                                                                                                                                                                                                                                                                                                                                                                                                                                                                                                                                                                                                                                                                                                                                                                                                                                                                                                                                                                                               |
|--------------|-----------------------------------------------------------------------------------------------------------------------------------------------------------------------------------------------------------------------------------------------------------------------------------------------------------------------------------------------------------------------------------------------------------------------------------------------------------------------------------------------------------------------------------------------------------------------------------------------------------------------------------------------------------------------------------------------------------------------------------------------------------------------------------------------------------------------------------------------------------------------------------------------------------------------------------------------------------------------------------------------------------------------------------------------------------------------------------------------------------------------------------------------------------------------------------------------------------------------------------------------------------------------------------------------------------------------------------------------------------------------------------------------|
|              | [7] pmid:18164222                                                                                                                                                                                                                                                                                                                                                                                                                                                                                                                                                                                                                                                                                                                                                                                                                                                                                                                                                                                                                                                                                                                                                                                                                                                                                                                                                                             |
|              | [8] pmid:19818650                                                                                                                                                                                                                                                                                                                                                                                                                                                                                                                                                                                                                                                                                                                                                                                                                                                                                                                                                                                                                                                                                                                                                                                                                                                                                                                                                                             |
|              | [9] pmid:21278738                                                                                                                                                                                                                                                                                                                                                                                                                                                                                                                                                                                                                                                                                                                                                                                                                                                                                                                                                                                                                                                                                                                                                                                                                                                                                                                                                                             |
|              | [10] pmid:20656683                                                                                                                                                                                                                                                                                                                                                                                                                                                                                                                                                                                                                                                                                                                                                                                                                                                                                                                                                                                                                                                                                                                                                                                                                                                                                                                                                                            |
| <b>IL17F</b> | 1 RORγt & AHR & AP1 & IRF4 & BLIMP1 & NFAT1 & (STAT3   STAT1) & !(STAT5B & STAT5A)                                                                                                                                                                                                                                                                                                                                                                                                                                                                                                                                                                                                                                                                                                                                                                                                                                                                                                                                                                                                                                                                                                                                                                                                                                                                                                            |
|              | IL-17F secreted by the cell [1] [2].<br>IL-17F transcription is activated by STAT3 (functional data in mice models) [3].<br>STAT4 is required for IL-17 production in response to IL-23 plus IL-18 (functional data in mice model) [3].<br>It is activated by AHR (functional data in mice model) [4] [8].<br>RORγt in combination with AP-1, NFAT, IRF4 binds to the IL-17 promoter region to induce transcription [5].<br>BLIMP-1 co-localizes with RORγt and STAT3 at IL-17A/F loci to enhance their expression. With T cells from the dLNs of mice was demonstrated that BLIMP-1-deficient IL-17 producers were not able to co-express GM-CSF and IFN-γ (functional data in mice model) [6].<br>BLIMP-1 peaks are found in IL-17F promoter region, but not in IL-17A promoter region [6].<br>Hence, we decided to consider a positive interaction from BLIMP-1 onto IL-17F, but not onto IL-17A.<br>It is known that STAT5 is an inhibitor of IL-17 (functional data in mice model) [7]. However, there is no information about which of the isoforms of STAT5 act as an inhibitor of IL-17, and whether this transcription factor preferentially inhibits IL-17F or IL-17A. ChIP-seq data revealed STAT5 peaks in IL-17F and IL-17F genomic regions (see the model companion article).<br>ChIP-seq data analysis revealed that STAT1 could modulate IL-17F directly, but not IL-17A [6]. |
|              | [1] hgnc:16404                                                                                                                                                                                                                                                                                                                                                                                                                                                                                                                                                                                                                                                                                                                                                                                                                                                                                                                                                                                                                                                                                                                                                                                                                                                                                                                                                                                |
|              | [2] uniprot:Q96PD4                                                                                                                                                                                                                                                                                                                                                                                                                                                                                                                                                                                                                                                                                                                                                                                                                                                                                                                                                                                                                                                                                                                                                                                                                                                                                                                                                                            |
|              | [3] pmid:17404271                                                                                                                                                                                                                                                                                                                                                                                                                                                                                                                                                                                                                                                                                                                                                                                                                                                                                                                                                                                                                                                                                                                                                                                                                                                                                                                                                                             |
|              | [4] pmid:18607004                                                                                                                                                                                                                                                                                                                                                                                                                                                                                                                                                                                                                                                                                                                                                                                                                                                                                                                                                                                                                                                                                                                                                                                                                                                                                                                                                                             |
|              | [5] pmid:20103781                                                                                                                                                                                                                                                                                                                                                                                                                                                                                                                                                                                                                                                                                                                                                                                                                                                                                                                                                                                                                                                                                                                                                                                                                                                                                                                                                                             |
|              | [6] pmid:26750311                                                                                                                                                                                                                                                                                                                                                                                                                                                                                                                                                                                                                                                                                                                                                                                                                                                                                                                                                                                                                                                                                                                                                                                                                                                                                                                                                                             |
|              | [7] pmid:21278738                                                                                                                                                                                                                                                                                                                                                                                                                                                                                                                                                                                                                                                                                                                                                                                                                                                                                                                                                                                                                                                                                                                                                                                                                                                                                                                                                                             |
|              | [8] pmid:25261206                                                                                                                                                                                                                                                                                                                                                                                                                                                                                                                                                                                                                                                                                                                                                                                                                                                                                                                                                                                                                                                                                                                                                                                                                                                                                                                                                                             |
|              | 1 (STAT3 & RUNX1)   (IRF4 & AP1 & NFAT1 & RUNX1 & !Tbet)                                                                                                                                                                                                                                                                                                                                                                                                                                                                                                                                                                                                                                                                                                                                                                                                                                                                                                                                                                                                                                                                                                                                                                                                                                                                                                                                      |



|              |                                                                                                                                                                                                                                                                                                                                                                                                                                                                                                                                                                                                                                                                                                                                                                                                                                                                                                                                                                                                                                                                                  |                         |
|--------------|----------------------------------------------------------------------------------------------------------------------------------------------------------------------------------------------------------------------------------------------------------------------------------------------------------------------------------------------------------------------------------------------------------------------------------------------------------------------------------------------------------------------------------------------------------------------------------------------------------------------------------------------------------------------------------------------------------------------------------------------------------------------------------------------------------------------------------------------------------------------------------------------------------------------------------------------------------------------------------------------------------------------------------------------------------------------------------|-------------------------|
| <b>RORgt</b> | <p>RORyt, RAR related orphan receptor C, Transcription factor [1] [2].<br/>         RUNX1 induces RORc expression (Expression and functional data in mice model) [3].<br/>         RORyt is inhibited by T-bet. T-bet interacts with the transcription factor RUNX1 and this interaction blocked RUNX1mediated transactivation of RORc (functional data in mice model) [3]. To simplify it has been decided to draw a direct interaction between T-bet and RORyt.<br/>         Activated by STAT3 (functional data in mice model) [4].<br/>         The development of inflammatory Th17 cells requires IRF4. IRF4 mediates STAT3 and RORyt expression (functional data in mice model) [5].<br/>         NFAT and AP-1 binds to the promoter of RORyt which is the master transcription factor of the Th17 lineage [6].<br/>         RORyt is induced by STAT5A (binding data) [7].<br/>         We hypothesized that there is a RORyt activation mechanism independent of STAT3, however it requires the presence of IRF4, NFAT1, AP-1, RUNX1 and the no presence of T-bet.</p> |                         |
|              | [1] hgnc:10260                                                                                                                                                                                                                                                                                                                                                                                                                                                                                                                                                                                                                                                                                                                                                                                                                                                                                                                                                                                                                                                                   |                         |
|              | [2] uniprot:P51449                                                                                                                                                                                                                                                                                                                                                                                                                                                                                                                                                                                                                                                                                                                                                                                                                                                                                                                                                                                                                                                               |                         |
|              | [3] pmid:21151104                                                                                                                                                                                                                                                                                                                                                                                                                                                                                                                                                                                                                                                                                                                                                                                                                                                                                                                                                                                                                                                                |                         |
|              | [4] pmid:17363300                                                                                                                                                                                                                                                                                                                                                                                                                                                                                                                                                                                                                                                                                                                                                                                                                                                                                                                                                                                                                                                                |                         |
|              | [5] pmid:17676043                                                                                                                                                                                                                                                                                                                                                                                                                                                                                                                                                                                                                                                                                                                                                                                                                                                                                                                                                                                                                                                                |                         |
|              | [6] pmid:20103781                                                                                                                                                                                                                                                                                                                                                                                                                                                                                                                                                                                                                                                                                                                                                                                                                                                                                                                                                                                                                                                                |                         |
|              | [7] pmid:23467089                                                                                                                                                                                                                                                                                                                                                                                                                                                                                                                                                                                                                                                                                                                                                                                                                                                                                                                                                                                                                                                                |                         |
| <b>TCR</b>   | 1                                                                                                                                                                                                                                                                                                                                                                                                                                                                                                                                                                                                                                                                                                                                                                                                                                                                                                                                                                                                                                                                                | MHCII:1 & Lck           |
|              | 2                                                                                                                                                                                                                                                                                                                                                                                                                                                                                                                                                                                                                                                                                                                                                                                                                                                                                                                                                                                                                                                                                | MHCII:2 & Lck           |
|              | <p>T-cell Receptor.<br/>         TCR is a molecule found on the surface of T cells, it is responsible to recognizing fragments of antigen as peptides bound to MHC II molecules [1].<br/>         The TCR chains all contain immunoreceptor tyrosine-based activation motifs (ITAMs) which are phosphorylated by the Src kinase leukocyte-specific tyrosine kinase (LCK), it is essential to start the intracellular signaling [1].<br/>         A high signal strength of TCR is achieved with a high level of MHCII.<br/>         TCR signaling components have been validated in Human CD4+ T cells.</p>                                                                                                                                                                                                                                                                                                                                                                                                                                                                      |                         |
|              | [1] pmid:19386893                                                                                                                                                                                                                                                                                                                                                                                                                                                                                                                                                                                                                                                                                                                                                                                                                                                                                                                                                                                                                                                                |                         |
| <b>IL1R</b>  | 1                                                                                                                                                                                                                                                                                                                                                                                                                                                                                                                                                                                                                                                                                                                                                                                                                                                                                                                                                                                                                                                                                | IL1_In & IL1RAP & IL1R1 |
|              | Activated by its subchain(s) IL1R1, IL1RAP and by its associated cytokine(s) (IL1).                                                                                                                                                                                                                                                                                                                                                                                                                                                                                                                                                                                                                                                                                                                                                                                                                                                                                                                                                                                              |                         |
| <b>CD28</b>  | <p>Cluster of Differentiation (CD) 28 [1].<br/>         CD28 is one of the proteins expressed on T cells that provide co-stimulatory signals required for T cell activation and survival. CD80, expressed on antigen-presenting cells interacts with CD28 to initiate the immune signal [2].<br/>         Ligand binding of CD28 induces the phosphorylation of tyrosine-containing sequences in its cytoplasmic tail by Scr-family kinases like Lck and subsequently induces its activation [3].</p>                                                                                                                                                                                                                                                                                                                                                                                                                                                                                                                                                                            |                         |

|                    |                                                                                                                                                                                                                                                                                                                                                                                                                                      |
|--------------------|--------------------------------------------------------------------------------------------------------------------------------------------------------------------------------------------------------------------------------------------------------------------------------------------------------------------------------------------------------------------------------------------------------------------------------------|
|                    | [1] hgnc:1653                                                                                                                                                                                                                                                                                                                                                                                                                        |
|                    | [2] uniprot:P10747                                                                                                                                                                                                                                                                                                                                                                                                                   |
|                    | [3] pmid:19386893                                                                                                                                                                                                                                                                                                                                                                                                                    |
| <b>LCK</b>         | 1   CD4 & TCR                                                                                                                                                                                                                                                                                                                                                                                                                        |
|                    | LCK, lymphocyte-specific protein tyrosine kinase [1] [2].<br>It has been proposed that ligand engagement by the TCR activates the Src kinase LCK, which in turns phosphorylates the TCR [3].<br>A significant proportion of LCK in the cell constitutively associates with the coreceptor CD4. Because CD4 also interacts with MHC molecules, CD4 recruits LCK to regions that contain TCR complex, allowing the LCK activation [4]. |
|                    | [1] hgnc:6524                                                                                                                                                                                                                                                                                                                                                                                                                        |
|                    | [2] uniprot:P06239                                                                                                                                                                                                                                                                                                                                                                                                                   |
|                    | [3] pmid:21190897                                                                                                                                                                                                                                                                                                                                                                                                                    |
| [4] pmid:19386893  |                                                                                                                                                                                                                                                                                                                                                                                                                                      |
| <b>CD4</b>         | Input node, fixed value defined with initial state                                                                                                                                                                                                                                                                                                                                                                                   |
|                    | CD4 molecule, Cluster of Differentiation 4 [1].<br>Glycoprotein found on the surface of immune cells such T helper cells. CD4 is a coreceptor of the TCR and assists the latter in communicating with antigen-presenting cells [2].                                                                                                                                                                                                  |
|                    | [1] hgnc:1678                                                                                                                                                                                                                                                                                                                                                                                                                        |
|                    | [2] uniprot:P01730                                                                                                                                                                                                                                                                                                                                                                                                                   |
| <b>ZAP70</b>       | 1   Lck & TCR                                                                                                                                                                                                                                                                                                                                                                                                                        |
|                    | ZAP70, Zeta-chain-associated protein kinase 70 [1].<br>Phosphorylated ITAMS (of TCR) recruit the Syk family kinase ZAP70 via Src-homology-2 SH2-domain interactions [2] [3].<br>LCK activates and phosphorylates ZAP70, after which it can transautophosphorylate and activate other vicinal ZAP70 molecules [4].                                                                                                                    |
|                    | [1] hgnc:12858                                                                                                                                                                                                                                                                                                                                                                                                                       |
|                    | [2] uniprot:P43403                                                                                                                                                                                                                                                                                                                                                                                                                   |
|                    | [3] KEGG:hsa04660                                                                                                                                                                                                                                                                                                                                                                                                                    |
| [4] pmid:29196709  |                                                                                                                                                                                                                                                                                                                                                                                                                                      |
| <b>LAT</b>         | 1   ZAP70                                                                                                                                                                                                                                                                                                                                                                                                                            |
|                    | Linker of Activated T cells [1]<br>LAT is activated by ZAP70 [2] [3].                                                                                                                                                                                                                                                                                                                                                                |
|                    | [1] hgnc:18874                                                                                                                                                                                                                                                                                                                                                                                                                       |
|                    | [2] KEGG:hsa04660                                                                                                                                                                                                                                                                                                                                                                                                                    |
| [3] uniprot:O43561 |                                                                                                                                                                                                                                                                                                                                                                                                                                      |
|                    | 1   (ZAP70 & LAT)   CD28                                                                                                                                                                                                                                                                                                                                                                                                             |

|             |                                                                                                                                                                                                                                                                                                                                                                                                                                                                                                                                                                                                                                                                                |                           |
|-------------|--------------------------------------------------------------------------------------------------------------------------------------------------------------------------------------------------------------------------------------------------------------------------------------------------------------------------------------------------------------------------------------------------------------------------------------------------------------------------------------------------------------------------------------------------------------------------------------------------------------------------------------------------------------------------------|---------------------------|
| <b>VAV</b>  | <p>Guanine Nucleotide Exchange Factor [1] ,<br/> VAV is activated by ZAP70, the VAV site (Y315) in ZAP70 is critical for antigen receptor-mediated signal transduction [2].<br/> CD28 signaling is dependent on VAV/Slp6 complex formation and induces membrane localization of these complexes. CD28 can cooperate with VAV/SLP-76 adaptors to upregulate interleukin 2/4 transcription independently of TCR ligation [3].<br/> LAT induces the recruitment of VAV to LAT complex [4].</p>                                                                                                                                                                                    |                           |
|             | [1] uniprot:P15498                                                                                                                                                                                                                                                                                                                                                                                                                                                                                                                                                                                                                                                             |                           |
|             | [2] pmid:8673706                                                                                                                                                                                                                                                                                                                                                                                                                                                                                                                                                                                                                                                               |                           |
|             | [3] pmid:11754814                                                                                                                                                                                                                                                                                                                                                                                                                                                                                                                                                                                                                                                              |                           |
|             | [4] KEGG:hsa04660                                                                                                                                                                                                                                                                                                                                                                                                                                                                                                                                                                                                                                                              |                           |
| <b>PI3K</b> | 1                                                                                                                                                                                                                                                                                                                                                                                                                                                                                                                                                                                                                                                                              | TCR:1 & CD28 & RAS & IL1R |
|             | 2                                                                                                                                                                                                                                                                                                                                                                                                                                                                                                                                                                                                                                                                              | TCR:2 & CD28 & RAS & IL1R |
|             | <p>PI3K, Phosphoinositide 3 kinase class IA<br/> Class IA PI3Ks are activated by T cell receptor and TCR signaling downstream components, such as by Ras [1].<br/> CD28 provides T-cell costimulation and enhances PI3K activity at the immune synapse [2].<br/> We suppose that PI3K has a high level when TCR achieve high strength (level 2 also).<br/> Validation in Human CD4+ T cell.<br/> A novel role for the phosphatidylinositol 3-kinase/AKT pathway in mediating induction of interleukin-6 (IL-6) in response to IL-1 is reported in [3].<br/> Pharmacological inhibition of phosphatidylinositol 3-kinase (PI3K) inhibited IL-6 mRNA and protein production.</p> |                           |
|             | [1] pmid:12660731                                                                                                                                                                                                                                                                                                                                                                                                                                                                                                                                                                                                                                                              |                           |
|             | [2] pmid:18006698                                                                                                                                                                                                                                                                                                                                                                                                                                                                                                                                                                                                                                                              |                           |
|             | [3] pmid:18515365                                                                                                                                                                                                                                                                                                                                                                                                                                                                                                                                                                                                                                                              |                           |
|             |                                                                                                                                                                                                                                                                                                                                                                                                                                                                                                                                                                                                                                                                                |                           |
| <b>SOS</b>  | 1                                                                                                                                                                                                                                                                                                                                                                                                                                                                                                                                                                                                                                                                              | LAT   CD28                |
|             | <p>Son of Sevenless [1].<br/> SOS is recruited by LAT through GRB2-related adapter protein, in other words, the activation of SOS requires of LAT [2].<br/> CD28 binds the SOS exchange factor and activates it [3].</p>                                                                                                                                                                                                                                                                                                                                                                                                                                                       |                           |
|             | [1] uniprot:Q07889                                                                                                                                                                                                                                                                                                                                                                                                                                                                                                                                                                                                                                                             |                           |
|             | [2] KEGG:hsa04660                                                                                                                                                                                                                                                                                                                                                                                                                                                                                                                                                                                                                                                              |                           |
|             | [3] pmid:7737275                                                                                                                                                                                                                                                                                                                                                                                                                                                                                                                                                                                                                                                               |                           |
| <b>PLCG</b> | 1                                                                                                                                                                                                                                                                                                                                                                                                                                                                                                                                                                                                                                                                              | LAT                       |
|             | <p>Phospholipase C, gamma 1[1] ,<br/> The LAT-Slp76 complex acts as a platform for the recruitment of signaling effectors, one of the most important is PLCG, which interacts directly with both LAT and Slp6 [2].</p>                                                                                                                                                                                                                                                                                                                                                                                                                                                         |                           |

|             |   |                                                                                                                                                                                                                                                                                                                                                                                                           |
|-------------|---|-----------------------------------------------------------------------------------------------------------------------------------------------------------------------------------------------------------------------------------------------------------------------------------------------------------------------------------------------------------------------------------------------------------|
|             |   | [1] hgnc:9065                                                                                                                                                                                                                                                                                                                                                                                             |
|             |   | [2] pmid:19386893                                                                                                                                                                                                                                                                                                                                                                                         |
| <b>RAC</b>  | 1 | VAV                                                                                                                                                                                                                                                                                                                                                                                                       |
|             |   | Rho family of GTPases small signaling G proteins. It is induced by VAV [1].                                                                                                                                                                                                                                                                                                                               |
|             |   | [1] KEGG:hsa04660                                                                                                                                                                                                                                                                                                                                                                                         |
| <b>PIP2</b> |   | Input node, fixed value defined with initial state.                                                                                                                                                                                                                                                                                                                                                       |
|             |   | Phosphatidylinositol-4-5-bisphosphate.<br>PIP2 is a negatively charged lipid that, it has a well-established role in the generation of second messengers in T cells signaling pathways [1]                                                                                                                                                                                                                |
|             |   | [1] pmid:12681284                                                                                                                                                                                                                                                                                                                                                                                         |
| <b>PTEN</b> | 1 | FOXP3                                                                                                                                                                                                                                                                                                                                                                                                     |
|             |   | Phosphatase and tensin homolog [1] ,<br>We suggest that FOXP3 induces the expression and activation of PTEN. During Treg induction, PTEN function is maintained through the stabilization of PTEN mRNA transcription and sustained protein levels [2].                                                                                                                                                    |
|             |   | [1] hgnc:9588                                                                                                                                                                                                                                                                                                                                                                                             |
|             |   | [2] pmid:25855357                                                                                                                                                                                                                                                                                                                                                                                         |
| <b>PIP3</b> | 1 | ((PI3K:1 & !PTEN)   PI3K:2) & PIP2                                                                                                                                                                                                                                                                                                                                                                        |
|             |   | Phosphatidylinositol-3,4,5-triphosphate.<br>PI3K phosphorylates PIP2 to form PIP3 on the inner membrane of the cell, thus initiating the downstream signaling components, in other words, to activate PIP3, the presence of PI3K (PI3K in a high level or PI3K in a low level but without the presence of PTEN) and PIP2 is necessary [1].<br>PTEN inhibits PI3K pathway, PTEN dephosphorylates PIP3 [1]. |
|             |   | [1] pmid:22905034                                                                                                                                                                                                                                                                                                                                                                                         |
| <b>IP3</b>  | 1 | PLCG & PIP2                                                                                                                                                                                                                                                                                                                                                                                               |
|             |   | Inositol triphosphate, diffusible second messenger.<br>PLCG transduces TCR signals by hydrolyzing PIP2 to yield DAG and IP3.<br>In other words, to obtain active IP3 is necessary the presence of PLCG and PIP2 [1].                                                                                                                                                                                      |
|             |   | [1] pmid:19386893                                                                                                                                                                                                                                                                                                                                                                                         |
| <b>DAG</b>  | 1 | PLCG & PIP2                                                                                                                                                                                                                                                                                                                                                                                               |
|             |   | Diacylglycerol, membrane-associated lipid.<br>PLCG transduces TCR signals by hydrolyzing PIP2 to yield DAG and IP3. In other words, the presence of PLCG and PIP2 is necessary to obtain active DAG [1].                                                                                                                                                                                                  |
|             |   | [1] pmid:19386893                                                                                                                                                                                                                                                                                                                                                                                         |
|             | 1 | DAG   PIP3                                                                                                                                                                                                                                                                                                                                                                                                |

|                   |                                                                                                                                                                                                                                                                                                                                                                                                                                                                                   |               |
|-------------------|-----------------------------------------------------------------------------------------------------------------------------------------------------------------------------------------------------------------------------------------------------------------------------------------------------------------------------------------------------------------------------------------------------------------------------------------------------------------------------------|---------------|
| <b>PKC0</b>       | Protein Kinase C theta<br>PKC0 is important for T cell activation, proliferation and cytokine production [1]. It is activated by PIP3 through PDK1 [2].<br>PKC0 is activated by DAG. Upon the initial receptor stimulation, PKC0 is recruited to plasma membrane via membrane-resident DAG binding to its C1 domain [3].                                                                                                                                                          |               |
|                   | [1] pmid:11956228                                                                                                                                                                                                                                                                                                                                                                                                                                                                 |               |
|                   | [2] pmid:22905034                                                                                                                                                                                                                                                                                                                                                                                                                                                                 |               |
|                   | [3] pmid:26528291                                                                                                                                                                                                                                                                                                                                                                                                                                                                 |               |
| <b>RAS</b>        | 1                                                                                                                                                                                                                                                                                                                                                                                                                                                                                 | SOS   DAG     |
|                   | Small GTPase RAS,<br>DAG activates RAS through RasGRP (RAS guanyl nucleotide-releasing protein) [1].<br>RAS can also be activated by SOS, which is recruited to LAT via the adaptor molecule Grb2 [1].                                                                                                                                                                                                                                                                            |               |
|                   | [1] pmid:19386893                                                                                                                                                                                                                                                                                                                                                                                                                                                                 |               |
| <b>ERK1_2</b>     | 1                                                                                                                                                                                                                                                                                                                                                                                                                                                                                 | RAS & ITK     |
|                   | Extracellular signal-regulated kinases, related with Mitogen-activated protein kinase 1 [1].<br>RAS is a crucial activator of MAPK signaling pathway. RAS starts activating C-Raf, followed by MEK and subsequently ERK [2] [3].<br>The ERK pathway is stimulated by the association of active RAS [3].<br>Expression of the Itk variant in primary murine T cells induced higher ERK activation and increased calcium flux upon TCR stimulation compared with wild-type ITK [4]. |               |
|                   | [1] uniprot:P28482                                                                                                                                                                                                                                                                                                                                                                                                                                                                |               |
|                   | [2] KEGG:hsa04660                                                                                                                                                                                                                                                                                                                                                                                                                                                                 |               |
|                   | [3] pmid:19386893                                                                                                                                                                                                                                                                                                                                                                                                                                                                 |               |
|                   | [4] pmid:20237289                                                                                                                                                                                                                                                                                                                                                                                                                                                                 |               |
| <b>c_FOS</b>      | 1                                                                                                                                                                                                                                                                                                                                                                                                                                                                                 | ERK1_2        |
|                   | c-Fos protein, Fos proto-oncogene, AP-1 transcription factor subunit [1] [2].<br>It is activated by ERK cascade [3].                                                                                                                                                                                                                                                                                                                                                              |               |
|                   | [1] hgnc:3796                                                                                                                                                                                                                                                                                                                                                                                                                                                                     |               |
|                   | [2] uniprot:P01100                                                                                                                                                                                                                                                                                                                                                                                                                                                                |               |
| [3] KEGG:hsa04660 |                                                                                                                                                                                                                                                                                                                                                                                                                                                                                   |               |
| <b>AP1</b>        | 1                                                                                                                                                                                                                                                                                                                                                                                                                                                                                 | c_Fos & c_Jun |
|                   | Activator protein 1, Transcription Factor.<br>MAPK signaling cascades stimulate AP-1 activity via the upregulation of FOS and JUN transcription and also by direct phosphorylation of the FOS and JUN proteins [1].                                                                                                                                                                                                                                                               |               |
| [1] pmid:19386893 |                                                                                                                                                                                                                                                                                                                                                                                                                                                                                   |               |

|                   |                                                                                                                                                                                                                                                                                                                                                                                                                                                                                                                                                                                  |              |
|-------------------|----------------------------------------------------------------------------------------------------------------------------------------------------------------------------------------------------------------------------------------------------------------------------------------------------------------------------------------------------------------------------------------------------------------------------------------------------------------------------------------------------------------------------------------------------------------------------------|--------------|
| <b>MEKK1</b>      | 1                                                                                                                                                                                                                                                                                                                                                                                                                                                                                                                                                                                | RAS   Rac    |
|                   | <p>Mitogen-activated protein kinase kinase kinase 1, gene MAP3K1 [1]. MEKK1 initiates the JNK and p38 signaling pathway [1]. A subgroup of MAPKKKs including the MEKK family proteins activate the MAPKKs proteins that phosphorylate JNK and p38 downstream. Downstream molecules that are activated by JNK include c-JUN [2]. MEKK1 is activated in response to growth factor stimulation of cells and by expression of activated RAS [3]. MEKK1 is activated by RAC. The JNK and p38 pathways respond to activated RAC in addition to RAS [4].</p>                            |              |
|                   | [1] uniprot:Q13233                                                                                                                                                                                                                                                                                                                                                                                                                                                                                                                                                               |              |
|                   | [2] pmid:10702308                                                                                                                                                                                                                                                                                                                                                                                                                                                                                                                                                                |              |
|                   | [3] pmid:7744823                                                                                                                                                                                                                                                                                                                                                                                                                                                                                                                                                                 |              |
|                   | [4] pmid:19386893                                                                                                                                                                                                                                                                                                                                                                                                                                                                                                                                                                |              |
| <b>TAK1</b>       | 1                                                                                                                                                                                                                                                                                                                                                                                                                                                                                                                                                                                | PKCO   TRAF6 |
|                   | <p>Transforming growth factor beta-activated kinase 1 or mitogen-activated protein kinase kinase kinase 7 MAP3K7 [1] [2]. TAK1 is activated by upstream molecules comprising PKC0 [3]. TAK1 is activated by TRAF6 [4]. TAK1 is involved in the IL-1 signaling pathway by activating two kinase cascades; one is a MAPK cascade leading to JNK and c-JUN activation and the other is a kinase cascade composed of NF-<math>\kappa</math>B-inducing kinase and I<math>\kappa</math>B kinases (IKK in the model), ultimately leading to NF-<math>\kappa</math>B activation [5].</p> |              |
|                   | [1] hgnc:6859                                                                                                                                                                                                                                                                                                                                                                                                                                                                                                                                                                    |              |
|                   | [2] uniprot:O43318                                                                                                                                                                                                                                                                                                                                                                                                                                                                                                                                                               |              |
|                   | [3] pmid:22941947                                                                                                                                                                                                                                                                                                                                                                                                                                                                                                                                                                |              |
|                   | [4] pmid:15125833                                                                                                                                                                                                                                                                                                                                                                                                                                                                                                                                                                |              |
| [5] pmid:10702308 |                                                                                                                                                                                                                                                                                                                                                                                                                                                                                                                                                                                  |              |
| <b>c_JUN</b>      | 1                                                                                                                                                                                                                                                                                                                                                                                                                                                                                                                                                                                | MEKK1   TAK1 |
|                   | <p>c-JUN protein, Jun proto-oncogene, AP-1 transcription factor subunit [1] [2] c-JUN is activated by JNK cascade through MEKK1 or TAK1 upstream signaling [3] [4].</p>                                                                                                                                                                                                                                                                                                                                                                                                          |              |
|                   | [1] hgnc:6204                                                                                                                                                                                                                                                                                                                                                                                                                                                                                                                                                                    |              |
|                   | [2] uniprot:P05412                                                                                                                                                                                                                                                                                                                                                                                                                                                                                                                                                               |              |
|                   | [3] KEGG:hsa04660                                                                                                                                                                                                                                                                                                                                                                                                                                                                                                                                                                |              |
| [4] pmid:23028407 |                                                                                                                                                                                                                                                                                                                                                                                                                                                                                                                                                                                  |              |
| <b>NFAT1</b>      | 1                                                                                                                                                                                                                                                                                                                                                                                                                                                                                                                                                                                | IP3          |
|                   | <p>Nuclear factor of activated T cells 1. Also named NFATp or NFATc2 [1] [2]. The production of IP3 stimulates the opening of Ca<sup>2+</sup>-permeable ion channels in the endoplasmic reticulum. This drives in NFAT induction or activation [3].</p>                                                                                                                                                                                                                                                                                                                          |              |

|                  |                                                                                                                                                                                                                                                                                                                                                          |
|------------------|----------------------------------------------------------------------------------------------------------------------------------------------------------------------------------------------------------------------------------------------------------------------------------------------------------------------------------------------------------|
|                  | [1] hgnc:7776                                                                                                                                                                                                                                                                                                                                            |
|                  | [2] uniprot:Q13469                                                                                                                                                                                                                                                                                                                                       |
|                  | [3] pmid:19386893                                                                                                                                                                                                                                                                                                                                        |
| <b>NFKB</b>      | 1   IKK                                                                                                                                                                                                                                                                                                                                                  |
|                  | NF- $\kappa$ B, Nuclear factor NF-kappa-B p100 subunit [1].<br>Under resting conditions, NF- $\kappa$ B is sequestered in the cytoplasm by inhibitor of KB (I $\kappa$ B), phosphorylation of I $\kappa$ B by IKK (I $\kappa$ B kinases complex) leads to the degradation of I $\kappa$ B, allowing to NF- $\kappa$ B to translocate to the nucleus [2]. |
|                  | [1] uniprot:Q00653                                                                                                                                                                                                                                                                                                                                       |
|                  | [2] pmid:19386893                                                                                                                                                                                                                                                                                                                                        |
| <b>IKK</b>       | 1   PKCO   TAK1                                                                                                                                                                                                                                                                                                                                          |
|                  | IKK, I $\kappa$ B kinases enzyme complex.<br>PKCO induces the activation of several adaptor proteins including IKK [1].<br>IKK may itself be regulated by additional enzymes like TAK1 Ser/Thr kinase [1].                                                                                                                                               |
|                  | [1] pmid:17544292                                                                                                                                                                                                                                                                                                                                        |
| <b>c_MAF</b>     | 1   STAT3                                                                                                                                                                                                                                                                                                                                                |
|                  | c-MAF, Transcription factor Maf [1].<br>STAT3 binds the c-MAF promoter in CD4T cell to activate c-MAF expression (binding data in mice model) [2].                                                                                                                                                                                                       |
|                  | [1] uniprot:O75444                                                                                                                                                                                                                                                                                                                                       |
|                  | [2] pmid:15728480                                                                                                                                                                                                                                                                                                                                        |
| <b>MYD88</b>     | 1   IL1R                                                                                                                                                                                                                                                                                                                                                 |
|                  | MYD88, Myeloid differentiation primary response 88 [1] [2].<br>MYD88 is recruited to the IL1 receptor complex following IL-1 stimulation and acts like an adaptor to bind IRAK, therefore IL1R is a an activator of MYD88 [3].                                                                                                                           |
|                  | [1] hgnc:7562                                                                                                                                                                                                                                                                                                                                            |
|                  | [2] uniprot:Q99836                                                                                                                                                                                                                                                                                                                                       |
|                  | [3] pmid:9430229                                                                                                                                                                                                                                                                                                                                         |
| <b>IRAK1_4</b>   | 1   Myd88                                                                                                                                                                                                                                                                                                                                                |
|                  | IRAK1-4, Interleukin1 receptor-associated kinase 1 [1] [2] and 4 [3] [4].<br>MYD88 is recruited to the IL-1 receptor complex following IL-1 stimulation and acts like an adaptor to bind IRAK, therefore MYD88 is an activator of IRAK1-4 [5].                                                                                                           |
|                  | [1] hgnc:6112                                                                                                                                                                                                                                                                                                                                            |
|                  | [2] uniprot:P51617                                                                                                                                                                                                                                                                                                                                       |
|                  | [3] hgnc:17967                                                                                                                                                                                                                                                                                                                                           |
|                  | [4] UniProtKB - Q9NWZ3                                                                                                                                                                                                                                                                                                                                   |
| [5] pmid:9430229 |                                                                                                                                                                                                                                                                                                                                                          |

|                                                                                                                                                  |                                                                                                                                                                                                                                                                                                                                                                                                                                                                                                                                                        |                         |
|--------------------------------------------------------------------------------------------------------------------------------------------------|--------------------------------------------------------------------------------------------------------------------------------------------------------------------------------------------------------------------------------------------------------------------------------------------------------------------------------------------------------------------------------------------------------------------------------------------------------------------------------------------------------------------------------------------------------|-------------------------|
| <b>TRAF6</b>                                                                                                                                     | 1                                                                                                                                                                                                                                                                                                                                                                                                                                                                                                                                                      | IRAK1_4                 |
|                                                                                                                                                  | TRAF6, TNF receptor associated factor 6 [1] [2].<br>Autophosphorylated IRAK1-4 interacts with TRAF6, leading to the activation of TRAF6 (functional data in human cells) [3].                                                                                                                                                                                                                                                                                                                                                                          |                         |
|                                                                                                                                                  | [1] hgnc:12036                                                                                                                                                                                                                                                                                                                                                                                                                                                                                                                                         |                         |
|                                                                                                                                                  | [2] uniprot:Q9Y4K3                                                                                                                                                                                                                                                                                                                                                                                                                                                                                                                                     |                         |
|                                                                                                                                                  | [3] pmid:18070982                                                                                                                                                                                                                                                                                                                                                                                                                                                                                                                                      |                         |
| <b>BLIMP1</b>                                                                                                                                    | 1                                                                                                                                                                                                                                                                                                                                                                                                                                                                                                                                                      | STAT4 & STAT5B & !STAT3 |
|                                                                                                                                                  | 2                                                                                                                                                                                                                                                                                                                                                                                                                                                                                                                                                      | STAT3 & STAT5B          |
|                                                                                                                                                  | BLIMP-1, PR domain zinc finger protein 1, Prdm1 gene, [1] [2].<br>BLIMP-1 expression in Th17 cells is STAT3 Dependent, Figure 1 (mice model) [3].<br>BLIMP-1 is induced by IL-12 in a STAT4-dependent manner, Figure 4 (mice model) [4].<br>BLIMP-1 is upregulated by STAT5 (mice model) [5].<br>Naive CD4+ T cells stimulated under anti-Th1 conditions express higher levels of BLIMP-1 steady-state mRNA [6]. For this reason, we consider that a high level of BLIMP-1 is achieved when STAT3 and STA5B are present and not STAT4 (a pro-Th1 TFs). |                         |
|                                                                                                                                                  | [1] hgnc:9346                                                                                                                                                                                                                                                                                                                                                                                                                                                                                                                                          |                         |
|                                                                                                                                                  | [2] uniprot:O75626                                                                                                                                                                                                                                                                                                                                                                                                                                                                                                                                     |                         |
|                                                                                                                                                  | [3] pmid:26750311                                                                                                                                                                                                                                                                                                                                                                                                                                                                                                                                      |                         |
|                                                                                                                                                  | [4] pmid:25073792                                                                                                                                                                                                                                                                                                                                                                                                                                                                                                                                      |                         |
|                                                                                                                                                  | [5] pmid:22318729                                                                                                                                                                                                                                                                                                                                                                                                                                                                                                                                      |                         |
|                                                                                                                                                  | [6] pmid:18370921                                                                                                                                                                                                                                                                                                                                                                                                                                                                                                                                      |                         |
|                                                                                                                                                  | <b>RUNX3</b>                                                                                                                                                                                                                                                                                                                                                                                                                                                                                                                                           | 1                       |
| RUNX3, Runt related transcription factor 3 [1] [2].<br>RUNX3 expression during Th1 differentiation requires T-bet (functional data in mice) [3]. |                                                                                                                                                                                                                                                                                                                                                                                                                                                                                                                                                        |                         |
| [1] hgnc:10473                                                                                                                                   |                                                                                                                                                                                                                                                                                                                                                                                                                                                                                                                                                        |                         |
| [2] uniprot:Q13761                                                                                                                               |                                                                                                                                                                                                                                                                                                                                                                                                                                                                                                                                                        |                         |
| [3] pmid:17195845                                                                                                                                |                                                                                                                                                                                                                                                                                                                                                                                                                                                                                                                                                        |                         |
| <b>EOMES</b>                                                                                                                                     | 1                                                                                                                                                                                                                                                                                                                                                                                                                                                                                                                                                      | RUNX3                   |
|                                                                                                                                                  | Eomesdermin [1] [2].<br>It was suggested that RUNX3 induces IFN- $\gamma$ production partly through its upregulation of EOMES expression (functional data in mice) [3].                                                                                                                                                                                                                                                                                                                                                                                |                         |
|                                                                                                                                                  | [1] hgnc:3372                                                                                                                                                                                                                                                                                                                                                                                                                                                                                                                                          |                         |
|                                                                                                                                                  | [2] uniprot:O95936                                                                                                                                                                                                                                                                                                                                                                                                                                                                                                                                     |                         |
| [3] pmid:20399120                                                                                                                                |                                                                                                                                                                                                                                                                                                                                                                                                                                                                                                                                                        |                         |



|                   |                                                                                                                                                                                                                                                                                                                                                                                                                                                                                                                                                                                                    |            |
|-------------------|----------------------------------------------------------------------------------------------------------------------------------------------------------------------------------------------------------------------------------------------------------------------------------------------------------------------------------------------------------------------------------------------------------------------------------------------------------------------------------------------------------------------------------------------------------------------------------------------------|------------|
| <b>IRF4</b>       | 1                                                                                                                                                                                                                                                                                                                                                                                                                                                                                                                                                                                                  | AP1 & NFkB |
|                   | <p>Interferon Regulatory factor 4 [1] [2].<br/> NF-k<math>\beta</math> subunits p52 and RelB are transcriptional activators of IRFA. The oncogenic transcription factor IRF4 is regulated by a novel CD30/NF-k<math>\beta</math> positive feedback loop in peripheral T-cell lymphoma (functional data in clinical samples) [3].<br/> TCR pathway is the major pathway to induce IRF4 in T cells, we suggest that AP-1 is an important activator of IRF4 [4].</p>                                                                                                                                  |            |
|                   | [1] hgnc:6119                                                                                                                                                                                                                                                                                                                                                                                                                                                                                                                                                                                      |            |
|                   | [2] uniprot:Q15306                                                                                                                                                                                                                                                                                                                                                                                                                                                                                                                                                                                 |            |
|                   | [3] pmid:25833963                                                                                                                                                                                                                                                                                                                                                                                                                                                                                                                                                                                  |            |
|                   | [4] pmid:24782159                                                                                                                                                                                                                                                                                                                                                                                                                                                                                                                                                                                  |            |
| <b>AHR</b>        | 1                                                                                                                                                                                                                                                                                                                                                                                                                                                                                                                                                                                                  | STAT3      |
|                   | <p>Aryl hydrocarbon receptor, transcription factor [1] [2].<br/> STAT3 regulates basal and cytokine-inducible AHR expression in HepG2 cells (binding data) [3].</p>                                                                                                                                                                                                                                                                                                                                                                                                                                |            |
|                   | [1] hgnc:348                                                                                                                                                                                                                                                                                                                                                                                                                                                                                                                                                                                       |            |
|                   | [2] uniprot:P35869                                                                                                                                                                                                                                                                                                                                                                                                                                                                                                                                                                                 |            |
| [3] pmid:24127753 |                                                                                                                                                                                                                                                                                                                                                                                                                                                                                                                                                                                                    |            |
| <b>MHCII</b>      | Input node, fixed value defined with initial state.                                                                                                                                                                                                                                                                                                                                                                                                                                                                                                                                                |            |
|                   | <p>Major Histocompatibility Complex class II,<br/> MHCII molecules bind peptide fragments derived from pathogens and display them on the cell surface for recognition by the appropriate T cells through TCR. Subsequently, immune response initiates [1].<br/> The two levels of MHCII refer to strength of interaction with peptide/MHC ligand and how it transmits the information. A high or low strength can be achieved by changing the amount or quality of peptide/MHC ligand [2]. We consider a high strength stimulation of MHCII (=2) to induce the activation of the virtual cell.</p> |            |
|                   | [1] Bookshelf ID:NBK27156                                                                                                                                                                                                                                                                                                                                                                                                                                                                                                                                                                          |            |
|                   | [2] pmid:21505216                                                                                                                                                                                                                                                                                                                                                                                                                                                                                                                                                                                  |            |
| <b>CD80</b>       | Input node, fixed value defined with initial state.                                                                                                                                                                                                                                                                                                                                                                                                                                                                                                                                                |            |
|                   | <p>Cluster of Differentiation 80 [1].<br/> Protein found on dendritic cells, activated B cells and monocytes and provides a costimulatory signal necessary for T cell activation and survival [2].</p>                                                                                                                                                                                                                                                                                                                                                                                             |            |
|                   | [1] hgnc:1700                                                                                                                                                                                                                                                                                                                                                                                                                                                                                                                                                                                      |            |
|                   | [2] uniprot:P33681                                                                                                                                                                                                                                                                                                                                                                                                                                                                                                                                                                                 |            |
|                   | 1                                                                                                                                                                                                                                                                                                                                                                                                                                                                                                                                                                                                  | IP3        |

|              |                                                                                                                                                                                                                                                                                                                                                                                                                                                            |     |
|--------------|------------------------------------------------------------------------------------------------------------------------------------------------------------------------------------------------------------------------------------------------------------------------------------------------------------------------------------------------------------------------------------------------------------------------------------------------------------|-----|
| <b>NFAT2</b> | <p>Nuclear factor of activated T cells 2 [1] [2].<br/> NFAT activity is regulated by the concentration of intracellular Ca<sup>2+</sup>. Increases in intracellular Ca<sup>2+</sup> lead to the dephosphorylation and nuclear import of NFAT, it means, its activation [3].<br/> The production of IP3 stimulates the opening of Ca<sup>2+</sup>-permeable ion channels in the endoplasmic reticulum. This drives in NFAT induction or activation [3].</p> |     |
|              | [1] hgnc:7775                                                                                                                                                                                                                                                                                                                                                                                                                                              |     |
|              | [2] uniprot:O95644                                                                                                                                                                                                                                                                                                                                                                                                                                         |     |
|              | [3] pmid:19386893                                                                                                                                                                                                                                                                                                                                                                                                                                          |     |
| <b>NFAT4</b> | 1                                                                                                                                                                                                                                                                                                                                                                                                                                                          | IP3 |
|              | <p>NFAT4, Nuclear factor of activated T cells 4 [1] [2]<br/> The production of IP3 stimulates the opening of Ca<sup>2+</sup>-permeable ion channels in the endoplasmic reticulum. This drives in NFAT induction or activation [3].</p>                                                                                                                                                                                                                     |     |
|              | [1] hgnc:7777                                                                                                                                                                                                                                                                                                                                                                                                                                              |     |
|              | [2] uniprot:Q12968                                                                                                                                                                                                                                                                                                                                                                                                                                         |     |
|              | [3] pmid:19386893                                                                                                                                                                                                                                                                                                                                                                                                                                          |     |
| 1            | !FOXP3 & NFAT1 & (NFAT4   NFAT2) & !NFAT2A:2 & ITK                                                                                                                                                                                                                                                                                                                                                                                                         |     |
| 2            | (! (FOXP3 & NFAT1) & ((NFAT1 & NFAT4 & ITK)   (NFAT1 & NFAT2)) & NFAT2A:2 & ITK)   (! (FOXP3 & NFAT1) & NFAT2A:2 & ITK)                                                                                                                                                                                                                                                                                                                                    |     |

**NFAT2A**

NFAT2A, Nuclear factor of activated T cells 2 isoform alpha. Although the main mode of NFAT regulation is through calcium and calcineurin, NFAT2 is apparently unique in that it is also regulated at the transcriptional level through an autoregulatory loop. The mechanism is isoform specific-only one of the two NFAT2 N-terminal splice variants, NFAT2A, is under the control of an NFAT-dependent inducible promoter. Only when sufficiently high levels of NFAT2 expression are attained would the self-sustaining positive autoregulatory loop function to maintain high levels of NFAT2 expression and NFAT activity (murine models) [1]. NFAT1 which is the main isoform in naive cells, act together with constitutively expressed NFAT2 and/or NFAT4 to turn on expression of the inducible isoform of NFAT2A (murine models) [1]. NFAT2A is inhibited by the complex NFAT1/FOXP3. FOXP3 competes with NFAT1 for binding to the endogenous of NFAT2 promoter. FOXP3 functions not only suppress the first wave of NFAT-mediated transcriptional responses, but may also affect sustained NFAT-mediated inflammatory gene expression through suppression of inducible NFAT2 transcriptio [3]. It has been corroborated that NFAT1/FOXP3 interaction might affect NFAT1-driven CD40L expression, although this interaction might affect IL-2, IFN- $\gamma$ , IL-6 and IL-17 production in response to TCR stimulation (functional and expression data in Jurkat cells) [2]. Hypothesis: FOXP3+NFAT1 complex inhibits IL-17A expression, through NFAT2A inhibition since NFAT2A induces IL-17A expression when it reaches a high level. This hypothesis is corroborated by experimental results, where NFAT1, NFAT2 and NFAT4 expression does not present changes between different conditions, but the expression of NFAT2A is unknown. Itk $^{-/-}$  cells show a selective defect in the binding of NFATc1 to the IL-17A promoter despite having an open chromatin conformation. ChIP analyses of WT cells differentiated under Th17 conditions demonstrated a large enrichment of NFATc1 binding to the conserved NFAT binding site in the IL-17A promoter. However, we saw no enrichment of amplification in samples from Itk $^{-/-}$  cells [4]. This data suggest that an edge between ITK and NFAT2A should be added to indicates that ITK possibly activates NFAT2 and the latter in turn binds to the IL-17A promoter.

[1] pmid:15928679

[2] pmid:26324768

[3] pmid:19564342

[4] pmid:19818650

1 | FOXP3 | (STAT5B & NFAT1 & SMAD2 & !STAT1 & !RORgt)

|              |                                                                                                                                                                                                                                                                                                                                                                                                                                                                                                                                                                                                                                                                                                                                                                                                      |                                                     |
|--------------|------------------------------------------------------------------------------------------------------------------------------------------------------------------------------------------------------------------------------------------------------------------------------------------------------------------------------------------------------------------------------------------------------------------------------------------------------------------------------------------------------------------------------------------------------------------------------------------------------------------------------------------------------------------------------------------------------------------------------------------------------------------------------------------------------|-----------------------------------------------------|
| <b>FOXP3</b> | <p>Forkhead box P3 with exon 7, Transcription Factor [1] [2].<br/> Effector T (Teff) cells can transiently express FOXP3 upon activation. STAT5-signaling cytokine induces FOXP3 upregulation in vitro in activated human T effec cells,(expression data in human cells) [3].<br/> Auto-activates (binding and functional data in mice model) [4].<br/> Activated by NFAT and SMAD3 (binding and functional data in mice cells) [5].<br/> Inhibited by RORyt (binding and functional data in human cells) [6].<br/> We assume that STAT1 inhibits FOXP3 (putative binding data in mice model) [7].<br/> We consider that FOXP3 autoactivation is not affected by the presence of STAT1 and RORgt, since it occurs when FOXP3 is overexpressed in the cell and the level of T-bet is enough high.</p> |                                                     |
|              | [1] hgnc:6106                                                                                                                                                                                                                                                                                                                                                                                                                                                                                                                                                                                                                                                                                                                                                                                        |                                                     |
|              | [2] uniprot:Q9BZS1                                                                                                                                                                                                                                                                                                                                                                                                                                                                                                                                                                                                                                                                                                                                                                                   |                                                     |
|              | [3] pmid:18270368                                                                                                                                                                                                                                                                                                                                                                                                                                                                                                                                                                                                                                                                                                                                                                                    |                                                     |
|              | [4] pmid:20072126                                                                                                                                                                                                                                                                                                                                                                                                                                                                                                                                                                                                                                                                                                                                                                                    |                                                     |
|              | [5] pmid:18157133                                                                                                                                                                                                                                                                                                                                                                                                                                                                                                                                                                                                                                                                                                                                                                                    |                                                     |
|              | [6] pmid:20427770                                                                                                                                                                                                                                                                                                                                                                                                                                                                                                                                                                                                                                                                                                                                                                                    |                                                     |
|              | [7] pmid:17298177                                                                                                                                                                                                                                                                                                                                                                                                                                                                                                                                                                                                                                                                                                                                                                                    |                                                     |
| <b>IL2R</b>  | 1                                                                                                                                                                                                                                                                                                                                                                                                                                                                                                                                                                                                                                                                                                                                                                                                    | CGC & IL2RB & !IL2RA & IL2                          |
|              | 2                                                                                                                                                                                                                                                                                                                                                                                                                                                                                                                                                                                                                                                                                                                                                                                                    | CGC & IL2RA & IL2 & IL2RB                           |
|              | <p>Receptor for IL-2, made of the subchains IL2RA or IL2RB, and CGC, activated by IL-2.<br/> When the IL2RA chain is present, a higher activation level can be reached.</p>                                                                                                                                                                                                                                                                                                                                                                                                                                                                                                                                                                                                                          |                                                     |
|              | 1                                                                                                                                                                                                                                                                                                                                                                                                                                                                                                                                                                                                                                                                                                                                                                                                    | ((SMAD2 & FOXP3)   STAT5B) & NFkB & NFAT2A & !SATB1 |

|              |                                                                                                                                                                                                                                                                                                                                                                                                                                                                                                                                                                                                                                                                                                                                                                                                                                                                                                                                                                                                                                                                                                                                                                                                                                                                                                                                                                                                                                                                                                                                                                                                                                                                                 |                                      |
|--------------|---------------------------------------------------------------------------------------------------------------------------------------------------------------------------------------------------------------------------------------------------------------------------------------------------------------------------------------------------------------------------------------------------------------------------------------------------------------------------------------------------------------------------------------------------------------------------------------------------------------------------------------------------------------------------------------------------------------------------------------------------------------------------------------------------------------------------------------------------------------------------------------------------------------------------------------------------------------------------------------------------------------------------------------------------------------------------------------------------------------------------------------------------------------------------------------------------------------------------------------------------------------------------------------------------------------------------------------------------------------------------------------------------------------------------------------------------------------------------------------------------------------------------------------------------------------------------------------------------------------------------------------------------------------------------------|--------------------------------------|
| <b>IL2RA</b> | <p>Interleukin 2 receptor subunit alpha (CD25) [1].<br/> IL2RA is a subchain of the IL-2 receptor [2].<br/> Activated by NFKB: Analysis of the human IL2RA promoter region revealed a critical element bound by NF-<math>\kappa</math>B (binding and functional data, human cells) [3].<br/> Activated by NFAT: Two NFAT sites were reported to control IL2RA promoter activity in T cells (functional and binding data in mice; also corroborated in human cells) [4].<br/> An interaction between NFAT2alpha and IL2RA is considered in the model. In addition, a medium level of NFAT2A (=1) is consider as sufficient to activate IL2RA.<br/> IL2RA expression is induced in cells treated with anti-CD3+ anti-CD28, together with TGF-<math>\beta</math>, through a region containing binding sites for SMAD3 (functional data in mice model) [5].<br/> Activated by FOXP3. It remains to be determined whether FOXP3 directly or indirectly activates the transcription of the IL2RA gene. We consider a direct interaction [6].<br/> Activated by STAT5: Yosef et al (2013) developed a network of TF-target gene associations from published genomics profiles, and predicted a direct interaction between STAT5B and IL2RA [7].<br/> Hence, we consider that STAT5B is sufficient to induce IL2RA expression (in conjunction with NF-<math>\kappa</math>B andNFAT2A, and that the presence of SMAD3 and FOXP3 is then not necessary.<br/> In the absence of STAT5B, FOXP3 and SMAD3 can activate IL2RA.<br/> SATB1 is a negative regulator of IL12 and IL2RA. SATB1 directly binds to the upstream regulatory region of IL2Ralpha (binding data, human cells) [8].</p> |                                      |
|              | [1] hgnc:6008                                                                                                                                                                                                                                                                                                                                                                                                                                                                                                                                                                                                                                                                                                                                                                                                                                                                                                                                                                                                                                                                                                                                                                                                                                                                                                                                                                                                                                                                                                                                                                                                                                                                   |                                      |
|              | [2] uniprot:P01589                                                                                                                                                                                                                                                                                                                                                                                                                                                                                                                                                                                                                                                                                                                                                                                                                                                                                                                                                                                                                                                                                                                                                                                                                                                                                                                                                                                                                                                                                                                                                                                                                                                              |                                      |
|              | [3] pmid:2497520                                                                                                                                                                                                                                                                                                                                                                                                                                                                                                                                                                                                                                                                                                                                                                                                                                                                                                                                                                                                                                                                                                                                                                                                                                                                                                                                                                                                                                                                                                                                                                                                                                                                |                                      |
|              | [4] pmid:9763616                                                                                                                                                                                                                                                                                                                                                                                                                                                                                                                                                                                                                                                                                                                                                                                                                                                                                                                                                                                                                                                                                                                                                                                                                                                                                                                                                                                                                                                                                                                                                                                                                                                                |                                      |
|              | [5] pmid:16087671                                                                                                                                                                                                                                                                                                                                                                                                                                                                                                                                                                                                                                                                                                                                                                                                                                                                                                                                                                                                                                                                                                                                                                                                                                                                                                                                                                                                                                                                                                                                                                                                                                                               |                                      |
|              | [6] pmid:16911870                                                                                                                                                                                                                                                                                                                                                                                                                                                                                                                                                                                                                                                                                                                                                                                                                                                                                                                                                                                                                                                                                                                                                                                                                                                                                                                                                                                                                                                                                                                                                                                                                                                               |                                      |
|              | [7] pmid:23467089                                                                                                                                                                                                                                                                                                                                                                                                                                                                                                                                                                                                                                                                                                                                                                                                                                                                                                                                                                                                                                                                                                                                                                                                                                                                                                                                                                                                                                                                                                                                                                                                                                                               |                                      |
|              | [8] pmid:15713622                                                                                                                                                                                                                                                                                                                                                                                                                                                                                                                                                                                                                                                                                                                                                                                                                                                                                                                                                                                                                                                                                                                                                                                                                                                                                                                                                                                                                                                                                                                                                                                                                                                               |                                      |
| <b>IL2RB</b> | 1                                                                                                                                                                                                                                                                                                                                                                                                                                                                                                                                                                                                                                                                                                                                                                                                                                                                                                                                                                                                                                                                                                                                                                                                                                                                                                                                                                                                                                                                                                                                                                                                                                                                               | Basal value.                         |
|              | <p>Interleukin 2 receptor subunit beta [1].<br/> IL2RB is a subchain of the IL-2 and IL-15 receptors [2].<br/> We consider its expression constitutive.</p>                                                                                                                                                                                                                                                                                                                                                                                                                                                                                                                                                                                                                                                                                                                                                                                                                                                                                                                                                                                                                                                                                                                                                                                                                                                                                                                                                                                                                                                                                                                     |                                      |
|              | [1] hgnc:6009                                                                                                                                                                                                                                                                                                                                                                                                                                                                                                                                                                                                                                                                                                                                                                                                                                                                                                                                                                                                                                                                                                                                                                                                                                                                                                                                                                                                                                                                                                                                                                                                                                                                   |                                      |
|              | [2] uniprot:P14784                                                                                                                                                                                                                                                                                                                                                                                                                                                                                                                                                                                                                                                                                                                                                                                                                                                                                                                                                                                                                                                                                                                                                                                                                                                                                                                                                                                                                                                                                                                                                                                                                                                              |                                      |
|              | 1                                                                                                                                                                                                                                                                                                                                                                                                                                                                                                                                                                                                                                                                                                                                                                                                                                                                                                                                                                                                                                                                                                                                                                                                                                                                                                                                                                                                                                                                                                                                                                                                                                                                               | IL2R & !((IL2R & !ERK1_2)   !ERK1_2) |
|              | 2                                                                                                                                                                                                                                                                                                                                                                                                                                                                                                                                                                                                                                                                                                                                                                                                                                                                                                                                                                                                                                                                                                                                                                                                                                                                                                                                                                                                                                                                                                                                                                                                                                                                               | (IL2R & !ERK1_2)   !ERK1_2           |

|               |                                                                                                                                                                                                                                                                                                                                                                                                                                                                                                  |                                      |
|---------------|--------------------------------------------------------------------------------------------------------------------------------------------------------------------------------------------------------------------------------------------------------------------------------------------------------------------------------------------------------------------------------------------------------------------------------------------------------------------------------------------------|--------------------------------------|
| <b>STAT5B</b> | Signal transducer and activator of transcription 5B, transcription factor [1] [2].<br>Activated by IL2R: (functional and binding data in human cells) [3].<br>Inhibited by ERK [4].<br>The presence of IL2 receptor at a high level (= 2) enables a high level of STAT5B (= 2) , provided that ERK is not present (otherwise, STAT5B can reach the level 1).<br>A medium level of IL2R (= 1) in the absence of ERK leads to medium levels of STAT5B (= 1).                                       |                                      |
|               | 1                                                                                                                                                                                                                                                                                                                                                                                                                                                                                                | [1] hgnc:11367                       |
|               | 2                                                                                                                                                                                                                                                                                                                                                                                                                                                                                                | [2] uniprot:P51692                   |
|               | 3                                                                                                                                                                                                                                                                                                                                                                                                                                                                                                | [3] pmid:7479881                     |
|               | 4                                                                                                                                                                                                                                                                                                                                                                                                                                                                                                | [4] pmid:23080204                    |
| <b>CGC</b>    | 1                                                                                                                                                                                                                                                                                                                                                                                                                                                                                                | (basal value)                        |
|               | Common Chain Gamma (Interleukin 2 receptor subunit gamma) [1].<br>CGC is a subchain shared by the IL-2, IL-4, IL-15 and IL-21 receptors [2].<br>We consider the constitutively expression of CGC.                                                                                                                                                                                                                                                                                                |                                      |
|               | 1                                                                                                                                                                                                                                                                                                                                                                                                                                                                                                | [1] hgnc:6010                        |
|               | 2                                                                                                                                                                                                                                                                                                                                                                                                                                                                                                | [2] uniprot:P31785                   |
| <b>IL2</b>    | 1                                                                                                                                                                                                                                                                                                                                                                                                                                                                                                | NFKB & AP1 & NFAT1 & !SATB1 & !FOXP3 |
|               | Interleukin 2 secreted by the cell [1] [2].<br>Activated by NF-k $\beta$ (binding and functional data in mice model) [3].<br>Activated by NFAT (functional data in mice model) [4].<br>AP-1, NF-k $\beta$ , NFAT and AP-1 cooperate to activate IL-2 transcription [5].<br>SATB1 is a negative regulator of IL-12 and IL2Ralpha. SATB1 directly binds to the upstream regulatory region of IL2Ralpha (binding data, human cells) [6].<br>Inhibited by FOXP3 (functional data in mice model) [7]. |                                      |
|               | 1                                                                                                                                                                                                                                                                                                                                                                                                                                                                                                | [1] hgnc:6001                        |
|               | 2                                                                                                                                                                                                                                                                                                                                                                                                                                                                                                | [2] uniprot:P60568                   |
|               | 3                                                                                                                                                                                                                                                                                                                                                                                                                                                                                                | [3] pmid:16275766                    |
|               | 4                                                                                                                                                                                                                                                                                                                                                                                                                                                                                                | [4] pmid:11163226                    |
|               | 5                                                                                                                                                                                                                                                                                                                                                                                                                                                                                                | [5] pmid:20103781                    |
|               | 6                                                                                                                                                                                                                                                                                                                                                                                                                                                                                                | [6] pmid:15713622                    |
| 7             | [7] pmid:15790681                                                                                                                                                                                                                                                                                                                                                                                                                                                                                |                                      |
|               | 1                                                                                                                                                                                                                                                                                                                                                                                                                                                                                                | TGFBR                                |

|                    |                                                                                                                                                                                                                                                                                                                                                                                                                                                                                                                                                                                                                                                                |                                                                       |
|--------------------|----------------------------------------------------------------------------------------------------------------------------------------------------------------------------------------------------------------------------------------------------------------------------------------------------------------------------------------------------------------------------------------------------------------------------------------------------------------------------------------------------------------------------------------------------------------------------------------------------------------------------------------------------------------|-----------------------------------------------------------------------|
| <b>SMAD2</b>       | SMAD 2, SMAD family member 2 [1] [2] - SMAD 3, SMAD family member 3 [3] [4].<br>SMAD2 and SMAD3 are activated by TGF- $\beta$ [5].<br>functional and binding data in mice model show that SMAD2 and SMAD3 are necessary for the differentiation of Tregs [6] through the activation of FOXP3 and IL2RA. In other hand, SMAD2 is required for IL17 differentiation [6] but SMAD3 inhibits it [7] , this indicates unique targets genes of specific SMADs.<br>We consider these interactions in the model with one unique node for SMAD2 and SMAD3, but in the annotation of IL-17A and FOXP3 we specify the only participation of SMAD2 and SMAD3 respectively. |                                                                       |
|                    | [1] hgnc:6768                                                                                                                                                                                                                                                                                                                                                                                                                                                                                                                                                                                                                                                  |                                                                       |
|                    | [2] uniprot:Q15796                                                                                                                                                                                                                                                                                                                                                                                                                                                                                                                                                                                                                                             |                                                                       |
|                    | [3] hgnc:6769                                                                                                                                                                                                                                                                                                                                                                                                                                                                                                                                                                                                                                                  |                                                                       |
|                    | [4] uniprot:P84022                                                                                                                                                                                                                                                                                                                                                                                                                                                                                                                                                                                                                                             |                                                                       |
|                    | [5] KEGG:hsa04350                                                                                                                                                                                                                                                                                                                                                                                                                                                                                                                                                                                                                                              |                                                                       |
|                    | [6] pmid:20656683                                                                                                                                                                                                                                                                                                                                                                                                                                                                                                                                                                                                                                              |                                                                       |
|                    | [7] pmid:19887374                                                                                                                                                                                                                                                                                                                                                                                                                                                                                                                                                                                                                                              |                                                                       |
| <b>STAT5A</b>      | 1                                                                                                                                                                                                                                                                                                                                                                                                                                                                                                                                                                                                                                                              | ((IL2R & IL1R)   (IL2R & IL12R)) & !(IL12R & IL1R & IL2R)             |
|                    | 2                                                                                                                                                                                                                                                                                                                                                                                                                                                                                                                                                                                                                                                              | IL2R & IL12R & IL1R                                                   |
|                    | Signal transducer and activator of transcription 5A, transcription factor [1] [2].<br>Activated by IL2R: (functional and bindind data in human cells) [3].<br>Activated by IL-12 and IL-1 $\beta$ , these interactions are induced from qPCR results showing that the expression of STAT5A was higher with the addition of IL-12 and IL-1 $\beta$ together in the medium, in comparison with IL-1 $\beta$ or IL-12 alone.<br>A high level IL2R (level 2), IL-12 and IL-1 $\beta$ cytokines are necessary to push STAT5A at its highest level.                                                                                                                  |                                                                       |
|                    | [1] hgnc:11366                                                                                                                                                                                                                                                                                                                                                                                                                                                                                                                                                                                                                                                 |                                                                       |
|                    | [2] uniprot:P42229                                                                                                                                                                                                                                                                                                                                                                                                                                                                                                                                                                                                                                             |                                                                       |
| [3] pmid:7479881   |                                                                                                                                                                                                                                                                                                                                                                                                                                                                                                                                                                                                                                                                |                                                                       |
| <b>GP130</b>       | 1                                                                                                                                                                                                                                                                                                                                                                                                                                                                                                                                                                                                                                                              | Basal value.                                                          |
|                    | Glycoprotein 130 (Interleukin 6 signal transducer pseudogene 1) [1].<br>GP130 is a subunit of IL-6, IL-21, IL-23 and IL-27 receptors [2].<br>We consider the constitutively expression of GP130.                                                                                                                                                                                                                                                                                                                                                                                                                                                               |                                                                       |
|                    | [1] hgnc:6022                                                                                                                                                                                                                                                                                                                                                                                                                                                                                                                                                                                                                                                  |                                                                       |
| [2] uniprot:P40189 |                                                                                                                                                                                                                                                                                                                                                                                                                                                                                                                                                                                                                                                                |                                                                       |
|                    | 1                                                                                                                                                                                                                                                                                                                                                                                                                                                                                                                                                                                                                                                              | (IL23_In & GP130 & IL12RB1 & STAT3 & RORGt)   (Myd88 & STAT3 & RORGt) |

|                |                                                                                                                                                                                                                                                                                                                                                                                                                                                                                                                                                                                                                                                                                                                                                                                                                                                                                                                                                                                                                                                                                               |                           |
|----------------|-----------------------------------------------------------------------------------------------------------------------------------------------------------------------------------------------------------------------------------------------------------------------------------------------------------------------------------------------------------------------------------------------------------------------------------------------------------------------------------------------------------------------------------------------------------------------------------------------------------------------------------------------------------------------------------------------------------------------------------------------------------------------------------------------------------------------------------------------------------------------------------------------------------------------------------------------------------------------------------------------------------------------------------------------------------------------------------------------|---------------------------|
| <b>IL23R</b>   | <p>IL23R, interleukin 23 receptor [1]<br/>         Composed of the subchains IL12RB1 and GP130, and activated by IL-23 [2].<br/>         Activated by ROR<math>\gamma</math>t:<br/>         ROR<math>\gamma</math>t presumably contributes to directing the expression of IL23R (functional data, mice model) [3].<br/>         Residual expression of IL23R, consistently found in the absence of ROR<math>\gamma</math>t, may be directed by STAT3. IL23R expression is completely abrogated in STAT3-deficient cells (functional data in mice model) [4].<br/>         MYD88-deficient Th17 cells show reduced IL23R expression and mTOR activation leading to impaired Th17 cell proliferation, suggesting that MYD88 is essential for inducing the IL23R expression necessary for IL-17 production (functional data, mice model) [5].<br/>         IL23R can be activated by IL-23 input or from internal cellular components, like MYD88.</p>                                                                                                                                           |                           |
|                | [1]                                                                                                                                                                                                                                                                                                                                                                                                                                                                                                                                                                                                                                                                                                                                                                                                                                                                                                                                                                                                                                                                                           | hgnc:19100                |
|                | [2]                                                                                                                                                                                                                                                                                                                                                                                                                                                                                                                                                                                                                                                                                                                                                                                                                                                                                                                                                                                                                                                                                           | uniprot:Q5VWK5            |
|                | [3]                                                                                                                                                                                                                                                                                                                                                                                                                                                                                                                                                                                                                                                                                                                                                                                                                                                                                                                                                                                                                                                                                           | pmid:17581537             |
|                | [4]                                                                                                                                                                                                                                                                                                                                                                                                                                                                                                                                                                                                                                                                                                                                                                                                                                                                                                                                                                                                                                                                                           | pmid:17277312             |
|                | [5]                                                                                                                                                                                                                                                                                                                                                                                                                                                                                                                                                                                                                                                                                                                                                                                                                                                                                                                                                                                                                                                                                           | pmid:23341605             |
| <b>FOXP3_2</b> | 1                                                                                                                                                                                                                                                                                                                                                                                                                                                                                                                                                                                                                                                                                                                                                                                                                                                                                                                                                                                                                                                                                             | IL1R & !MINA              |
|                | <p>FOXP3 forkhead box P3 isoform, excision of exon 7.<br/>         IL-1<math>\beta</math> promotes excision of FOXP3 exon7, Figure 2 (human cells and biopsies) [1]. Although the article directly mentions the participation of IL-1<math>\beta</math> in the induction of FOXP3 isoform, we suggest that it does so through the receptor.<br/>         MINA promotes the Th17 program and inhibits the FOXP3 expression, Experimental validation in mice models [2].<br/>         FOXP3 is an inhibitor of SATB1 (see SATB1 annotation).<br/>         We observed that FOXP3 is expressed in greater quantity in the Th17 condition, while its expression is reduced in the IL-12 + IL-1<math>\beta</math> condition.<br/>         SATB1 and MINA are up-regulated in the condition IL-12 + IL-1<math>\beta</math> and down-regulated in the condition Th17.<br/>         When MINA is present, FOXP3 lowers its expression and SATB1 is not inhibited by FOXP3, which increases its expression.<br/>         In the model we hypothesize that FOXP3delta7 is involved in this circuit.</p> |                           |
|                | [1]                                                                                                                                                                                                                                                                                                                                                                                                                                                                                                                                                                                                                                                                                                                                                                                                                                                                                                                                                                                                                                                                                           | pmid:26441347             |
|                | [2]                                                                                                                                                                                                                                                                                                                                                                                                                                                                                                                                                                                                                                                                                                                                                                                                                                                                                                                                                                                                                                                                                           | pmid:23467089             |
|                | 1                                                                                                                                                                                                                                                                                                                                                                                                                                                                                                                                                                                                                                                                                                                                                                                                                                                                                                                                                                                                                                                                                             | ROR $\gamma$ t & !FOXP3_2 |



|                   |                                                                                                                                                                                                                                                                                                                                                                                                                                                                                                                                                                                                                                                                                                                                                                                                                                                                                                                                                                                                                        |                                      |
|-------------------|------------------------------------------------------------------------------------------------------------------------------------------------------------------------------------------------------------------------------------------------------------------------------------------------------------------------------------------------------------------------------------------------------------------------------------------------------------------------------------------------------------------------------------------------------------------------------------------------------------------------------------------------------------------------------------------------------------------------------------------------------------------------------------------------------------------------------------------------------------------------------------------------------------------------------------------------------------------------------------------------------------------------|--------------------------------------|
| <b>SATB1</b>      | <p>DNA binding protein SATB1[1].<br/> FOXP3 acts as a transcriptional repressor, directly suppressing the SATB1 locus and indirectly through induction of miRNAs that bound the SATB1 3'UTR (binding data, human cells) [2]. It remains unclear which isoform of FOXP3 inhibits SATB1.<br/> SATB1 is induced by RORyt [3]. Yosef's model does not specify whether the interaction is positive or negative and we hypothesize that it is positive based on TF expression data (qPCR measurements).<br/> We observe that FOXP3 is expressed in greater quantity in the Th17 condition, while its expression is reduced in the IL-12 + IL-1<math>\beta</math> condition.<br/> SATB1 and MINA are upregulated in the condition IL-12 + IL-1<math>\beta</math> and downregulated in the condition Th17.<br/> When MINA is present, FOXP3 lowers its expression and SATB1 is not inhibited by FOXP3, which increases its expression.<br/> In the model, we hypothesize that the FOXP3delta7 is involved in this circuit.</p> |                                      |
|                   | [1] uniprot:Q01826                                                                                                                                                                                                                                                                                                                                                                                                                                                                                                                                                                                                                                                                                                                                                                                                                                                                                                                                                                                                     |                                      |
|                   | [2] pmid:21841785                                                                                                                                                                                                                                                                                                                                                                                                                                                                                                                                                                                                                                                                                                                                                                                                                                                                                                                                                                                                      |                                      |
|                   | [3] pmid:23467089                                                                                                                                                                                                                                                                                                                                                                                                                                                                                                                                                                                                                                                                                                                                                                                                                                                                                                                                                                                                      |                                      |
| <b>MINA</b>       | 1                                                                                                                                                                                                                                                                                                                                                                                                                                                                                                                                                                                                                                                                                                                                                                                                                                                                                                                                                                                                                      | RORgt & !STAT5A                      |
|                   | <p>MINA is induced by RORyt (validation using a RORyt-knockout mice model) [1].<br/> MINA is presumably inhibited by STAT5A [1]. Yosef's model does not specify whether the interaction is positive or negative and we hypothesize that it is negative in base of TFs expression data (qPCR data).<br/> FOXP3 is expressed in greater quantity in the Th17 condition, while its expression is reduced in the IL-12 + IL-1<math>\beta</math> condition. SATB1 and MINA are up-regulated in the condition IL-12 + IL-1<math>\beta</math> and down-regulated in the condition Th17. When MINA is present, FOXP3 lowers its expression and SATB1 is not inhibited by FOXP3, which increases its expression. In the model we hypothesize that the FOXP3delta7 isoform is the one that is involved in the mentioned circuit.</p>                                                                                                                                                                                             |                                      |
|                   | [1] pmid:23467089                                                                                                                                                                                                                                                                                                                                                                                                                                                                                                                                                                                                                                                                                                                                                                                                                                                                                                                                                                                                      |                                      |
| <b>RUNX1</b>      | 1                                                                                                                                                                                                                                                                                                                                                                                                                                                                                                                                                                                                                                                                                                                                                                                                                                                                                                                                                                                                                      | STAT3 & !RORgt                       |
|                   | 2                                                                                                                                                                                                                                                                                                                                                                                                                                                                                                                                                                                                                                                                                                                                                                                                                                                                                                                                                                                                                      | STAT3 & RORgt                        |
|                   | <p>Runt-related transcription factor 1 [1] [2].<br/> RUNX1 is presumably activated by RORyt (binding data) [3].<br/> It is presumably activated by STAT3(binding data) [3] .<br/> An overexpression of RUNX1 is important to reverse the inhibitory effects of T-bet on IL-17A production by Th17 cells, for this reason, we consider two levels of RUNX1 in the model.</p>                                                                                                                                                                                                                                                                                                                                                                                                                                                                                                                                                                                                                                            |                                      |
|                   | [1] hgnc:10471                                                                                                                                                                                                                                                                                                                                                                                                                                                                                                                                                                                                                                                                                                                                                                                                                                                                                                                                                                                                         |                                      |
|                   | [2] uniprot:Q01196                                                                                                                                                                                                                                                                                                                                                                                                                                                                                                                                                                                                                                                                                                                                                                                                                                                                                                                                                                                                     |                                      |
| [3] pmid:23467089 |                                                                                                                                                                                                                                                                                                                                                                                                                                                                                                                                                                                                                                                                                                                                                                                                                                                                                                                                                                                                                        |                                      |
|                   | 1                                                                                                                                                                                                                                                                                                                                                                                                                                                                                                                                                                                                                                                                                                                                                                                                                                                                                                                                                                                                                      | IRF4 & STAT3 & RUNX1 & RORgt & IL23R |

|              |                                                                                                                                                                                                                                                                                                                                                                                                                                                                                                                     |                            |
|--------------|---------------------------------------------------------------------------------------------------------------------------------------------------------------------------------------------------------------------------------------------------------------------------------------------------------------------------------------------------------------------------------------------------------------------------------------------------------------------------------------------------------------------|----------------------------|
| <b>RORa</b>  | RAR related Orphan Receptor alpha, transcription factor [1] [2].<br>RORa is highly expressed in Th17 cells in a STAT3-dependent manner, Figure 1c (functional data in mice model) [3].<br>Is activated by IRF4, RUNX1, RORyt, these interactions were predicted in [4] (binding data). We assume that a positive interaction is established between the three components and RORa.<br>Hypothesis: IL23R induces directly the expression of RORa, we assume this hypothesis in based on experimental results (qPCR). |                            |
|              | [1] hgnc:10258                                                                                                                                                                                                                                                                                                                                                                                                                                                                                                      |                            |
|              | [2] uniprot:P35398                                                                                                                                                                                                                                                                                                                                                                                                                                                                                                  |                            |
|              | [3] pmid:18164222                                                                                                                                                                                                                                                                                                                                                                                                                                                                                                   |                            |
|              | [4] pmid:23467089                                                                                                                                                                                                                                                                                                                                                                                                                                                                                                   |                            |
| <b>IL6R</b>  | 1                                                                                                                                                                                                                                                                                                                                                                                                                                                                                                                   | GP130 & (IL6_In   IL6_Aut) |
|              | Interleukin 6 receptor [1].<br>Composed of the subchains IL6R and GP130 and activated by external and autocrine IL6 [2].                                                                                                                                                                                                                                                                                                                                                                                            |                            |
|              | [1] hgnc:6019                                                                                                                                                                                                                                                                                                                                                                                                                                                                                                       |                            |
|              | [2] uniprot:P08887                                                                                                                                                                                                                                                                                                                                                                                                                                                                                                  |                            |
| <b>TGFBR</b> | 1                                                                                                                                                                                                                                                                                                                                                                                                                                                                                                                   | TGFB_In                    |
|              | Transforming growth factor beta receptor 1 [1].<br>Activated by its subchain(s) and by external TGF- $\beta$ [2].                                                                                                                                                                                                                                                                                                                                                                                                   |                            |
|              | [1] hgnc:11772                                                                                                                                                                                                                                                                                                                                                                                                                                                                                                      |                            |
|              | [2] uniprot:P01137                                                                                                                                                                                                                                                                                                                                                                                                                                                                                                  |                            |
| <b>CXCR4</b> | 1                                                                                                                                                                                                                                                                                                                                                                                                                                                                                                                   | !(IL12R & IL1R)            |
|              | C-X-C motif chemokine receptor 4, CXCR4 [1] , [2].<br>We hypothesized that CXCR4 is inhibited by IL-12 + IL-1 $\beta$ based on our experimental data.                                                                                                                                                                                                                                                                                                                                                               |                            |
|              | [1] hgnc:2561                                                                                                                                                                                                                                                                                                                                                                                                                                                                                                       |                            |
|              | [2] uniprot:P61073                                                                                                                                                                                                                                                                                                                                                                                                                                                                                                  |                            |
| <b>ITK</b>   | 1                                                                                                                                                                                                                                                                                                                                                                                                                                                                                                                   | TCR & !CXCR4               |
|              | 2                                                                                                                                                                                                                                                                                                                                                                                                                                                                                                                   | TCR & CXCR4                |
|              | Interleukin-2 inducible T cell kinase, ITK [1] [2].<br>ITK participates in the crosstalk between TCR and cytokine signaling that differentially affects the activation of distinct signaling pathways involving mTOR and STAT5 activation downstream of IL-2. ITK is activated by TCR [3].<br>We consider that CXCR4 directly activates Itk based on our experimental data.                                                                                                                                         |                            |
|              | [1] hgnc:6171                                                                                                                                                                                                                                                                                                                                                                                                                                                                                                       |                            |
|              | [2] uniprot:Q08881                                                                                                                                                                                                                                                                                                                                                                                                                                                                                                  |                            |
|              | [3] pmid:24534190                                                                                                                                                                                                                                                                                                                                                                                                                                                                                                   |                            |

**Supplementary Table 5. Impact of selected perturbations on Th cell differentiation in pro Th1 and Th17 conditions.** Suffices  $_0$ ,  $_1$  or  $_2$  denote a blockade of the corresponding component to the value 0 (knock-out), 1 or 2 (ectopic activation). Single and double perturbations are considered.

| Perturbations            | IL-12+IL-1 $\beta$ phenotypes                                                         | Th17 phenotypes                      |
|--------------------------|---------------------------------------------------------------------------------------|--------------------------------------|
| None                     | IFN- $\gamma$ +IL-17F+<br>IL-17F+<br>IFN- $\gamma$ +                                  | IL-17A+<br>IL-17F+<br>IL-17A+IL-17F+ |
| SMAD2 $_1$               | IFN- $\gamma$ +IL-17F+<br>IFN- $\gamma$ +IL-17A+IL-17F+<br>IL-17F+<br>IFN- $\gamma$ + | IL-17F+<br>IL-17A+IL-17F+<br>IL-17A+ |
| SMAD2 $_0$               | IFN- $\gamma$ +<br>IL-17F+<br>IFN- $\gamma$ +IL-17F+                                  | IL-17F+                              |
| NFAT2A $_2$              | IFN- $\gamma$ +IL-17F+<br>IFN- $\gamma$ +<br>IL-17F+                                  | IL-17A+IL-17F+<br>IL-17A+            |
| NFAT2A $_0$              | IFN- $\gamma$ +<br>IL-17F+<br>IFN- $\gamma$ +IL-17F+                                  | IL-17F+                              |
| STAT5A $_1$              | IFN- $\gamma$ +IL-17F+<br>IL-17F+                                                     | IL-17+<br>IL-17A+IL-17F+             |
| STAT5A $_0$              | IFN- $\gamma$                                                                         | IL-17A+                              |
| SMAD2 $_0$ _NFAT2A $_2$  | IFN- $\gamma$ +<br>IL-17F+<br>IFN- $\gamma$ +IL-17F+                                  | IL-17F+                              |
| SMAD2 $_0$ _STAT5A $_0$  | IFN- $\gamma$ +                                                                       | no phenotype                         |
| SMAD2 $_1$ _NFAT2A $_2$  | IFN- $\gamma$ +IL-17A+IL-17F+<br>IFN- $\gamma$ +IL-17A+<br>IL-17A+IL-17F+<br>IL-17A+  | IL-17A+IL-17F+<br>IL-17A+            |
| SMAD2 $_1$ _NFAT2A $_1$  | IFN- $\gamma$ +<br>IL-17F+<br>IFN- $\gamma$ +IL-17F+                                  | IL-17F+                              |
| SMAD2 $_1$ _NFAT2A $_0$  | IFN- $\gamma$ +<br>IL-17F+<br>IFN- $\gamma$ +IL-17F+                                  | IL-17F+                              |
| SMAD2 $_1$ _STAT5A $_1$  | IFN- $\gamma$ +IL-17F+<br>IFN- $\gamma$ +IL-17A+IL-17F+<br>IL-17F+<br>IL-17A+IL-17F+  | IL-17F+<br>IL-17A+IL-17F+            |
| SMAD2 $_1$ _STAT5A $_0$  | IFN- $\gamma$ +<br>IFN- $\gamma$ +IL-17A+<br>IL-17A+                                  | IL-17A+                              |
| NFAT2A $_2$ _STAT5A $_1$ | IFN- $\gamma$ +IL-17F+<br>IL-17F+                                                     | IL-17A+IL-17F+<br>IL-17A+            |
| NFAT2A $_2$ _STAT5A $_0$ | IFN- $\gamma$ +                                                                       | IL-17A+                              |

**Supplementary Table 6. Bibliographical references supporting our tentative mechanistic model for IL-17A and IL-17F differential expression.** This table list bibliographic references (1<sup>st</sup> author (year), and PubMed identifier) providing support for the molecular mechanisms presumably underlying the differential expression between IL-17A and IL-17F, as shown in Fig. 7.

| <b>Reported data</b>                               | <b>Reference</b>             | <b>PMID</b> |
|----------------------------------------------------|------------------------------|-------------|
| SMAD2 and STAT3 interactions                       | Jeong-Hwan et al (2015)      | 26194464    |
| NFATc1 binding sites in IL-17A promoter            | Gomez-Rodriguez et al (2009) | 19818650    |
| STAT5 repression towards IL-17F                    | Capone and Volpe (2020)      | 32226427    |
| SMAD2 and CBP co-activator interactions            | Cocolackis et al (2008)      | 18024957    |
| STAT5 support Th17 activation                      | Revu et al (2018)            | 29514093    |
| STAT5 and STAT3 balance to regulate Th17           | Xiang-Ping et al (2011)      | 21278738    |
| General epigenetic mechanisms                      | Moore et al (2013)           | 22781841    |
| Histone acetylation mechanism                      | Sterner and Berger (2000)    | 10839822    |
| CBP and its HAT activity                           | Soutoglou et al (2001)       | 11296231    |
| Epigenetic mechanisms in IL-17A expression         | Hammitzsch et al (2015)      | 26261308    |
| Epigenetic mechanisms in IL-17A expression         | Adamik et al (2013)          | 23800789    |
| Epigenetic mechanisms in IL-17A expression         | Wang et al (2012)            | 22244845    |
| Epigenetic mechanisms of STAT5                     | Ogawa et al (2014)           | 24298014    |
| Epigenetic mechanisms in ROR $\gamma$ t expression | Rutz et al (2015)            | 27481185    |
| Epigenetic mechanisms in ROR $\gamma$ t expression | He et al (2017)              | 29158945    |
